1 **Multiplexed imaging of immune cells in staged multiple sclerosis lesions by mass**  
2 **cytometry**

3 Valeria Ramaglia<sup>1\*</sup>, Salma Sheikh-Mohamed<sup>1</sup>, Karen Legg<sup>1</sup>, Olga L Rojas<sup>1</sup>, Stephanie  
4 Zandee<sup>2</sup>, Fred Fu<sup>4</sup>, Olga Ornatsky<sup>3</sup>, Eric C Swanson<sup>3</sup>, Alexandre Prat<sup>2</sup>, Trevor D McKee<sup>4</sup> and  
5 Jennifer L Gommerman<sup>1</sup>

6 <sup>1</sup>Department of Immunology, University of Toronto, Toronto, Ontario, Canada.

7 <sup>2</sup>Department of Neuroscience, Faculty of Medicine, Université de Montreal, and  
8 Neuroimmunology Unit, CRCHUM, Montreal, Quebec, Canada.

9 <sup>3</sup>Fluidigm Inc., Markham Ontario

10 <sup>4</sup>STTARR Innovation center, University Health Network, Toronto, Ontario, Canada.

11

12 \*Corresponding author:

13 [v.ramaglia@utoronto.ca](mailto:v.ramaglia@utoronto.ca)

14 Tel: +1 416-978-4119

15 Fax: +1 416-978-1938

16

17 Subject area: Immunology and Inflammation

18

19 Keywords: Imaging mass cytometry, multiple sclerosis, lesions, immunopathology

20

21 Acknowledgements: This work was funded by a team grant from the MS Society Research  
22 Foundation to AP and JG, and the National Multiple Sclerosis Society Research Grant RR-  
23 1602-07777 to VR.

24 **ABSTRACT**

25 Multiple Sclerosis (MS) is characterized by demyelinated and inflammatory lesions in the  
26 brain and spinal cord. Lesions contain immune cells with variable phenotypes and functions.  
27 Here we use imaging mass cytometry (IMC) to enable the simultaneous imaging of 15+  
28 proteins within 11 staged MS lesions. Using this approach, we demonstrated that the  
29 majority of demyelinating macrophage-like cells in active lesions were derived from the  
30 resident microglial pool. Although CD8<sup>+</sup> T cells predominantly infiltrated the lesions, CD4<sup>+</sup>  
31 T cells were also abundant but localized closer to blood vessels. B cells with a predominant  
32 switched memory phenotype were enriched across all lesion stages and were found to  
33 preferentially infiltrate the tissue as compared to unswitched B cells which localized to the  
34 vasculature. We propose that IMC will enable a comprehensive analysis of single-cell  
35 phenotypes, their functional states and cell-cell interactions in relation to lesion  
36 morphometry and demyelinating activity in the MS brain.

37

## 38 INTRODUCTION

39 Multiple sclerosis (MS) is a disease with profound heterogeneity in the neuropathological  
40 and immunopathological appearance of lesions in the central nervous system (CNS)[28].  
41 Recent consensus has standardized staging of MS brain tissue into categories including  
42 normal-appearing white matter (NAWM), (p)reactive lesions (or “pre-phagocytic” lesions)[3]  
43 which may represent an initial lesion[32,1], periplaque white matter (PPWM) which is  
44 immediately adjacent to a lesion, early or late active demyelinating lesions, mixed  
45 active/inactive demyelinating lesions (also called slowly expanding or “smouldering”[16]),  
46 and inactive lesions[25]. The pattern of demyelination can also be fundamentally different  
47 between patients, with pattern I being T cell-mediated, pattern II being IgG- and  
48 complement-mediated, and pattern III and IV characterized by a primary oligodendrocyte  
49 dystrophy reminiscent of virus- or toxin-induced demyelination rather than  
50 autoimmunity[15].

51  
52 Lymphocytes, microglia and macrophages are associated with active demyelination and  
53 neurodegeneration in the MS brain[18,15] and are thought to play key roles in the disease  
54 process, as supported by studies in experimental models (reviewed in[36]). Depending on  
55 the type of lesion and the sub-region within a lesion (for example center vs edge), different  
56 myeloid and lymphoid cells can be found. These have a variety of phenotypes that reflect  
57 activation state and pathologic potential. With respect to myeloid cells, yolk sac-derived  
58 (resident) microglia and blood-derived (recruited) monocytes/macrophages accumulate at  
59 sites of active demyelination and neuroaxonal injury[15]. Microglia and macrophages  
60 within the MS brain can lose their normally homeostatic properties and acquire a pro-  
61 inflammatory phenotype with expression of molecules involved in phagocytosis, oxidative  
62 injury, antigen presentation and T cell co-stimulation[17]. Either via T cell-mediated

63 recognition of myelin epitopes[41] or complement binding to myelin autoantibodies[40],  
64 these lymphocyte-dependent events initiate a process that results in the activation of  
65 microglia and recruitment of macrophages at the lesion site. Microglia and macrophages  
66 become activated and internalize myelin, degrading it within their lysosomes. The detection  
67 of small (myelin oligodendrocyte glycoprotein, MOG) or large (proteolipid protein, PLP)  
68 myelin proteins indicates the temporal development of myelin destruction[28,25].

69

70 In terms of lymphocytes, MS lesions contain T cells and CD20<sup>+</sup> B cells[31]. In active  
71 lesions, CD8<sup>+</sup> T cells proliferate and have an activated cytotoxic phenotype. Subsequently,  
72 some CD8<sup>+</sup> T cells are destroyed by apoptosis while others, with tissue-resident memory  
73 features, persist. Tissue resident memory T cells lose expression of surface molecules that  
74 are involved in the egress of leukocytes from inflamed tissue, which has been suggested as  
75 a potential mechanism responsible for the compartmentalized inflammatory response in  
76 established lesions[31]. CD4<sup>+</sup> T cells are also found in MS lesions and have been shown to  
77 produce cytokines such as IL-17 and IFN $\gamma$ [23]. B cells are thought to differentiate into  
78 plasma cells, perhaps *in situ*, but little is known about their phenotype[31].

79

80 While past and recent immunohistological studies have provided insights into the types of  
81 immune cells populating MS lesions at different lesional stages and the neurodegenerative  
82 changes that accompany these infiltrating immune cells[31,29,44,35,14,15], this type of  
83 analysis requires immunohistological staining of serial sections and is limited to the number  
84 of analytes that can be simultaneously visualized on a given tissue section. Thus, a  
85 comprehensive analysis of single-cell phenotypes and functional states in relation to  
86 demyelination within MS tissue is lacking. To circumvent this challenge, we have employed  
87 imaging mass cytometry (IMC). IMC uses time-of-flight inductively coupled plasma mass

88 spectrometry to detect dozens of markers simultaneously on a single tissue section. It  
89 achieves this by measuring the abundance of metal isotopes tagged to antibodies and indexed  
90 against their source location[10]. Applying this new technology to post-mortem MS brain  
91 tissue, we carefully analysed staged lesions in a case with severe rebound MS disease  
92 activity after natalizumab (NTZ) cessation[26]. The data we collected suggests that imaging  
93 mass cytometry, in combination with existing imaging techniques, can profoundly impact  
94 our knowledge of the inflammatory response and tissue injury in the MS brain.

## 95 MATERIALS & METHODS

96 **Patient case report and pathological analysis of the brain.** The clinical and pathological  
97 characteristics of the case reported in this study have been previously published[26]. Briefly,  
98 the patient was a 32-year-old female, diagnosed with relapsing-remitting MS in 2005.  
99 Natalizumab (NTZ) therapy was initiated (expanded disability status scale (EDSS) 5.0 per  
100 relapse, and 3.5 upon induction on NTZ) but stopped after 2 years because, although clinically  
101 and radiologically stable (EDSS 2.0), the patient tested positive to the John Cunningham virus  
102 (JCV) virus antibody titer. Glatiramer acetate was started 1 month prior to NTZ cessation, and  
103 the patient received a 5-day course of intravenous (iv) methylprednisolone after the last NTZ  
104 infusion. Four months later, the patient was hospitalized for the presentation of new motor and  
105 cognitive deficits. Over the course of 2 weeks, the patient worsened (EDSS 9.5). Despite daily  
106 course of iv methylprednisolone, the patient developed several new gadolinium-enhancing  
107 lesions on repeated MRI. Since no clinical or radiological improvements were observed, the  
108 family decided to stop active care, as per patient's previous wishes. Autopsy was performed  
109 within 1 hour post-mortem, 4 days after withdrawal of all medication.

110 The patient had previously provided written consent for post-mortem donation of the  
111 CNS to research (ethics committee approval number BH.07.001). Pathological analysis of the  
112 brain revealed abundant, active demyelinating, and highly inflammatory MS lesions with  
113 immunological pattern II (IgG- and complement-mediated)[26], according to Lucchinetti et  
114 al[28]. Despite the extent of the inflammation, progressive multifocal leukoencephalopathy or  
115 immune reconstitution inflammatory syndrome (IRIS) were excluded, from a pathological  
116 point of view, although a later study proposed that Epstein-Barr virus-associated IRIS could  
117 have been the possible cause of the fulminant MS relapse in this case[39]. Of note,  
118 immunohistochemistry and qPCR for JCV was reported negative. Finally, the  
119 neuropathologist-confirmed diagnosis of severe MS rebound inflammatory demyelinating

120 activity after NTZ withdrawal[26]. The non-neurological control case was an 86-year-old  
121 female that died of cardiac arrest. This control case was obtained from the Netherlands Brain  
122 Bank (VU Medical Center ethic committee approval Reference number 2009/148).

123

124 **Sample characterization.** Our study was performed on two frozen tissue blocks from the MS  
125 case and one frozen tissue block from the non-neurological control case. We analysed  
126 immunopathological changes in the white matter of the MS case, focusing on the following  
127 regions of interest (ROI) in lesions staged according to Kuhlmann et al[25] (see **Figure 1 –**  
128 **Figure Supplement 1**): normal-appearing white matter (NAWM), located > 1 cm distant from  
129 any lesions (detected in the block); the periplaque white matter (PPWM), located < 1 cm distant  
130 from any lesions; (p)reactive lesions, that may represent the initial stage of a lesion[32,1,25],  
131 defined by the presence of microglia/macrophages in the absence of (obvious) demyelination,  
132 as described by Luchetti et al[29]; early active demyelinating lesions defined by presence of  
133 microglia/macrophages with early (MOG) and late (PLP) myelin degradation products  
134 throughout the lesion, as described[7], and previously shown for this MS case[26], supporting  
135 the abundance of demyelinating activity in this type of lesions; the active edge of mixed active-  
136 inactive demyelinating lesions defined as slowly expanding lesions or smouldering lesions by  
137 Frischer et al, that are normally present in the progressive stage of MS[16] but have also been  
138 described in cases with acute MS[44]; and lastly the inactive center of a mixed active-inactive  
139 demyelinating lesion. The normal white matter of control (WMC) was analysed as a reference  
140 background for the immunopathological composition of the lesions in the MS case. The lesion  
141 types and ROI analysed are indicated in **Table 1**.

142

143 **Selection of inflammatory markers.** To define inflammatory cells as a whole, we used CD45,  
144 a general marker for microglia, macrophages and lymphocytes, with CD45<sup>low/+</sup> indicative of

145 microglia and CD45<sup>high</sup> indicative of macrophages and lymphocytes. For microglia we  
146 additionally used TMEM119, that is expressed on yolk sac-derived (resident) microglia but not  
147 on recruited blood-derived macrophages[5,38]. Other markers were used to detect  
148 phagocytosis (CD68) and capacity for antigen presentation (human leukocyte antigen, HLA).  
149 All T cells were detected with the cellular marker CD3. CD8 $\alpha$  detected MHC class I restricted  
150 T cells while CD4 detected MHC class II restricted T cells. All B cells were identified by the  
151 expression of either the kappa ( $\kappa$ ) or lambda ( $\lambda$ ) allelic variants of the immunoglobulin light  
152 chain. CD38 was used to detect a multifunctional molecule expressed by leucocytes in general  
153 and involved in the activation of T cells and B cells. IgM was used to identify naïve and non-  
154 class switch memory B cells, in addition to detecting free immunoglobulins. Furthermore,  
155 microglia and T cells express the transcription factor nuclear factor of activated T cells  
156 (NFAT1), that translocates to the nucleus upon activation[12]. Therefore, we determined the  
157 localization of NFAT1 as an additional activation antigen of CD45<sup>low/+</sup>TMEM119<sup>+</sup> microglia  
158 and CD45<sup>high</sup>CD3<sup>+</sup>CD8 $\alpha$ <sup>+</sup> or CD45<sup>high</sup>CD3<sup>+</sup>CD8 $\alpha$ <sup>-</sup> T cells. We also used the Ki67 marker of  
159 cell proliferation and PLP to identify myelin. Blood vessels were identified using markers of  
160 extracellular matrix (collagen) and endothelial cells (CD31). Each antibody clone was first  
161 titrated for immunofluorescence staining in control and MS tissue, according to the dilutions  
162 shown in **Table 2**, prior to methial-conjugation and IMC application.

163

164 **Histology, immunohistochemistry (IHC) and immunofluorescence (IF).** Ten-micron  
165 frozen tissue sections were mounted on Superfrost Plus glass slides (Knittel Glass) and stored  
166 at -80 °C until they were stained.

167

168 *Histology.* On the day of the staining, the slides were brought at room temperature and post-  
169 fixed in 10% formalin for 3 hours. Tissue sections were stained with Hematoxylin and Eosin



170 (HE)/Luxol Fast Blue (LFB) to detect myelin lipids and Oil red O (ORO) to detect neutral  
171 lipids in phagocytic macrophages, as previously published[34].

172

173 *IHC*. On the day of the staining, the slides were brought to room temperature and post-fixed in  
174 ice-cold acetone for 10 minutes. Myelin protein was detected using an antibody for proteolipid  
175 protein (PLP) and microglia/macrophages were detected using an antibody for human  
176 leukocyte antigen (HLA). Endogenous peroxidases activity was blocked by incubation in PBS  
177 with 0.3% H<sub>2</sub>O<sub>2</sub> for 20 minutes at room temperature. Non-specific protein binding was blocked  
178 by incubation with 10% normal goat serum (DAKO). Primary antibodies were applied  
179 overnight at 4 °C, diluted in normal antibody diluent (Immunologic, Duiven, The Netherlands)  
180 according to dilutions noted in **Table 2**. The following day, sections were incubated with a  
181 post-antibody blocking solution for monoclonal antibodies (Immunologic) diluted 1:1 in PBS  
182 for 15 minutes at RT. Detection was performed by incubating tissue sections in secondary Poly-  
183 HRP (horseradish peroxidase)-goat anti-mouse/rabbit/rat IgG (Immunologic) antibodies  
184 diluted 1:1 in PBS for 30 minutes at RT followed by application of DAB (3,3-  
185 diaminobenzidine tetrahydrochloride (Vector Laboratories, Burlingame, CA, U.S.A.) as a  
186 chromogen. Counterstaining was performed with hematoxylin (Sigma-Aldrich) for 10 minutes.  
187 The sections were subsequently dehydrated through a series of ethyl alcohol solutions and then  
188 placed in xylene before being coverslipped with Entellan mounting media (Sigma Aldrich).  
189 The colorimetric staining was visualized under a light microscope (Axioscope, Zeiss),  
190 connected to a digital camera (AxioCam MRc, Zeiss) and imaged with Zen pro 2.0 imaging  
191 software (Zeiss).

192

193 *IF*. On the day of the staining, the slides were brought to room temperature and incubated in  
194 ice-cold acetone for 10 minutes followed by 70% ethanol for 10 minutes to reduce the

195 autofluorescence signal derived from the fatty myelin sheets. Slides were subsequently  
196 rehydrated in 0.05% PBS-tween for 10 minutes at room temperature followed by incubation in  
197 10% normal goat serum (DAKO) to block nonspecific binding sites. Sections were then  
198 incubated overnight at 4°C with primary antibody diluted in 3% normal goat serum (see  
199 dilutions in **Table 2**). Primary antibodies were detected using fluorochrome-conjugated  
200 secondary antibodies (Sigma-Aldrich) diluted 1:200 in 1% Triton-X100. Sections were  
201 incubated with DAPI (Sigma Aldrich) diluted 1:3000 to visualize the nuclei. Slides were  
202 washed in PBS, air dried and mounted in aqueous mounting medium. Using the appropriate  
203 filters, the IF signal was visualized with an Axio Imager Z1, Zeiss microscope connected to a  
204 digital camera (AxioCam 506 mono, Zeiss) and imaged with Zen pro 2.0 imaging software  
205 (Zeiss).

206 To control for antibodies specificity, tissue sections were stained according to the IF or  
207 IHC protocols described above except for the primary antibody incubation step, which was  
208 omitted.

209

210 **Imaging mass cytometry.** The work flow of imaging mass cytometry is shown in **Figure 1 –**  
211 **Supplement Figure 2** and explained in detail below.

212 *Conjugation of antibodies with lanthanide metals.* Lanthanide metal-conjugated antibodies were  
213 either obtained from Fluidigm (Markham, Ontario, Canada) or conjugated at SickKids-UHN Flow  
214 and Mass Cytometry Facility (Toronto, Ontario, Canada), using the MaxPar X8 labelling kit from  
215 Fluidigm (catalogue number 201169B) as previously described[19]. Briefly, a purified carrier-free  
216 antibody was partially reduced with TCEP buffer (Fluidigm, catalogue number 77720) at 37°C.  
217 The reduced antibody was then incubated with an excess of metal-loaded MaxPar X8 polymer for  
218 90 minutes at 37°C. The metal-labeled antibody was then recovered using a 50kDa size exclusion  
219 filter. The percent yield of metal-conjugated antibody was determined by measuring the absorbance

220 of the conjugate at 280nm. The recovery of our metal-conjugated antibodies was 69-78%. Antibody  
221 stabilizer was then added to the metal-conjugated antibodies before long-term storage at 4°C.

222

223 *Staining for Imaging Mass Cytometry.* On the day of staining, the slides were brought to room  
224 temperature and rehydrated with 0.05% PBS-Tween in a humidified chamber for 20 minutes at  
225 room temperature. Non-specific protein binding was blocked by incubation with 10% normal  
226 goat serum for 20 minutes at room temperature followed by incubation with blocking solution  
227 (ThermoScientific Superblock Blocking Buffer in PBS) for 45 minutes at room temperature. A  
228 cocktail of primary antibodies, diluted in 0.5% BSA, was applied overnight at 4°C at the dilutions  
229 indicated in **Table 2**. The following day, slides were first washed with 0.05% PBS-Tween and then  
230 with PBS, followed by incubation with Iridium-conjugated intercalator (Fluidigm, catalogue  
231 number 201192B), diluted 1:2000 in 0.5% BSA for 30 minutes at room temperature. Lastly, slides  
232 were dipped in water (Invitrogen ultrapure distilled water), air dried and stored at room temperature  
233 until they were ablated.

234

235 *Identification of region of interest (ROI) for laser ablation.* Two serial sections each stained for  
236 either IF or IMC, were used. Based on IF staining with an antibody specific for proteolipid  
237 protein (PLP) (to visualize myelin) and DAPI (to visualize nuclei), ROIs were selected for  
238 ablation to capture the regions of interest for this study.

239

240 *High-spatial resolution laser ablation of tissue sections.* Tissue sections were analyzed by IMC,  
241 which couples laser ablation techniques and CyTOF mass spectrometry[2] (Cytof software v6.7).  
242 Briefly, a UV laser beam ( $\lambda = 219$  nm) with a  $1\mu\text{m} \times 1\mu\text{m}$  spot size is used to ablate the tissue. The  
243 laser rasters across the tissue at a rate of 200Hz (200 pixels/s) with the requisite energy to fully  
244 remove the tissue within the selected region of interest. The ablated tissue is then carried by a stream

245 of inert helium and argon gas into the Helios (a CyTOF system) where the material is completely  
246 ionized in the inductively coupled plasma. The ionized material then passes through high pass ion  
247 optics to remove ions with a mass less than 75amu before the ions enter the time of flight detector  
248 where they are separated based on their mass[6,4].

249

250 *Data analysis and image visualization.* Images of each mass channel were reconstructed by  
251 plotting the laser shot signals in the same order they were recorded, line scan by line scan, generating  
252 pseudo-colored intensity maps of each mass channel. These data were examined using MCD Viewer  
253 (V.1.0.560, Fluidigm). For qualitative assessments, images remained at the automatic threshold  
254 generated by MCD Viewer, based on the on the 98th percentile of signal. For further analysis, data  
255 was exported from MCD Viewer as tiff files, and each channel was run through an individual  
256 analysis pipeline in CellProfiler[8,22] (V3.185) in order to despeckle the image. Composite images  
257 were created for each ROI using Image J (V1.52a), and any changes to the brightness or contrast  
258 of a given marker were consistent across ROIs.

259

260 *Calculation of the limit of detection.* MCD Viewer was used to export text files acquired with the  
261 Hyperion IMC instrument (Fluidigm Inc., Markham ON), which were then converted to 32-bit  
262 single-channel TIFF images. The polygon tool within ImageJ 1.15s was used to manually outline  
263 the ROI (white matter of control, normal-appearing white matter) or subROI (periplaque white  
264 matter, lesion edge, lesion core), manually identified on the bases of PLP, HLA and Iridium-  
265 intercalator signals. Grey matter was excluded from subsequent analysis. Each image was  
266 despeckled in Definiens Developer XD 2.7 (Definiens Inc, Munich, Germany), using a 2D gray-  
267 level morphological opening filter with kernel radius of 1. In addition, the intensities of each marker  
268 were normalized using a modified z score approach, in which the intensity of each pixel is divided  
269 by the sum of (mean intensity of the image plus 3 times the standard deviation of the pixels in

270 the image)  $I_{zs} = I / (\mu_{Im} + 3 * \sigma_{Im})$ . This normalization approach has been previously used [13] and we  
271 found that it allows for a reliable comparison between IMC markers across different channels, with  
272 per-marker comparisons holding robustly across a 16-fold antibody dilution series (data not shown).

273

274 *Single-cell segmentation.* In order to define cells, we used a customized segmentation algorithm that  
275 took into account both the presence of nuclear DNA Iridium-intercalator as well as a set of markers  
276 of interest (see example in **Figure 7 – Supplement Figure 1**). In brief, a Gaussian blur was applied  
277 to the DNA signal and the resulting blurred image was segmented to identify nuclear content  
278 (**Figure 7 – Supplement Figure 1a**). Segmentation around the nuclei was expanded to simulate the  
279 cytoplasm, corresponding to individual cell areas, using a combination of threshold and watershed  
280 filters (**Figure 7 – Supplement Figure 1b**). Next we interrogated the segmented image for the  
281 presence of specific markers or combinations of markers that are either biologically co-expressed,  
282 or whose expression is mutually exclusive, according to the combination of markers indicated in  
283 **Table 3**. If a nucleated cell was positive for a marker or a combination of markers (see example for  
284 CD3 in **Figure 7 – Supplement Figure 1c**), the marker(s) signal was used to refine the initial  
285 nuclear segmentation. Nucleated cells that were not positive for any of the markers used, were  
286 segmented purely based on DNA signal and expanded to simulate the cytoplasmic area around the  
287 nucleus.

288

289 *Gating strategy for quantitative analysis of T cell, B cell, macrophage and microglial cell*  
290 *subsets.* A segmented cell export of raw and normalized marker intensities for all channels in each  
291 region of interest were exported as a single csv file. The per-cell mean intensities of each marker  
292 combination, (see marker list in **Table 3**), were linearly rescaled for visualization purposes. 2D log-  
293 log biaxial scatterplots of these intensities were generated in Python  
294 (V3.6.8) using matplotlib (V3.0.3). A positive- and negative-gating strategy was applied to establish

295 thresholds that identify particular cell types (see **Figure 7 – Supplement Figure 2** and the method  
296 below). Quadrants were set on pathologist-verified positive cells. In brief, ROI were examined  
297 in Definiens Developer XD 2.7. Cells were manually annotated by a pathologist, based on the  
298 expression of a biologically relevant set of markers to identify cells in each class of interest as  
299 defined below. These identified positive cells were superimposed to the 2D log-log scatterplots to  
300 definitively establish gates that would capture the appropriate positivity range of each cell phenotype  
301 as shown in **Figure 7 – Supplement Figure 2**.

302 *For T cells:* All nucleated cells expressing Ig $\kappa$ , Ig $\lambda$ , IgM, CD68 and HLA were eliminated, as  
303 these markers are not expressed on T cells. Gates were established for CD3 and CD45 based  
304 on a 2D log-log scatterplot of these markers. Following the identification of T-lineage cells,  
305 the same procedure was performed for CD3 vs CD4 and CD3 vs CD8, resulting in the  
306 identification of two subpopulations: CD4<sup>+</sup> T cells and CD8<sup>+</sup> T cells. Thresholds for Ki67 (a  
307 marker of proliferation) and NFAT1 (a marker of activation) were established based on manually  
308 annotated CD3<sup>+</sup>KI67<sup>+</sup> and CD3<sup>+</sup>NFAT1<sup>+</sup> cells, as described above. All cell populations were  
309 validated by manual annotation as described above.

310 *For B Cells:* All nucleated cells expressing CD3, CD4, CD8 and CD68 were eliminated as  
311 these markers are not expressed on B cells. B cells were further identified by CD45 above the  
312 same threshold set for T cells. Scatterplot comparison for Ig $\kappa$  and Ig $\lambda$  intensity identified Ig $\kappa$ <sup>+</sup> and  
313 Ig $\lambda$ <sup>+</sup> single-positive populations. Ig $\kappa$ <sup>+</sup>Ig $\lambda$ <sup>+</sup> double positive cells were eliminated as artifactual, since  
314 the two allelic variant cannot co-exist on a given cell. Within Ig $\kappa$ <sup>+</sup> or Ig $\lambda$ <sup>+</sup> B-lineage cells, we  
315 compared IgM to CD38 to determine the relative abundance of IgM<sup>+</sup> or CD38<sup>+</sup> cell subpopulations.  
316 All cell populations were validated by manual annotation as described above.

317 *For macrophages and microglia:* All nucleated cells expressing CD3, CD4, CD8, Ig $\kappa$ / $\lambda$  and  
318 IgM were eliminated as these markers are not expressed on macrophages and microglia.  
319 Discrimination of the remaining cells was visualized in a scatterplot for TMEM119 and CD45.

320 The threshold for TMEM119 positive signal was determined by comparison to TMEM119<sup>+</sup>  
321 microglial cells that were identified by manual observation, relative to other cell types. The  
322 threshold for CD45 high or low signal was determined by the comparison to manually  
323 identified TMEM<sup>+</sup> macrophages. Manually identified microglial cells were used to establish  
324 the lower limit of the CD45 quadrants. Cells that were low for both TMEM119 and CD45 were  
325 labeled “other” and ignored from subsequent analysis. These latter cells, likely correspond to  
326 astrocytes, oligodendrocytes and other cell types. Both TMEM119<sup>+</sup>CD45<sup>low/+</sup> microglial cells  
327 and TMEM<sup>+</sup>CD45<sup>high</sup> macrophages were further evaluated for HLA, CD68 and PLP (depicted  
328 as scatterplots), to differentiate microglia or macrophages that are either resting or  
329 activated/phagocytic/demyelinating. All cell populations were validated by manual annotation as  
330 described above.

331

332 *Generation of cell density map.* The gating strategy described above was confirmed by plotting the  
333 appropriately gated cell types for major lineage markers (see examples in **Figure 7 – Supplement**  
334 **Figure 3**). Note that  $Ig\kappa > Ig\lambda$  in **Figure 7 – Supplement Figure 3a** consistent with over-  
335 representatino of  $\kappa^+$  B cells in humans[24]. Following this confirmation, the density of all relevant  
336 cell subtypes was computed within each biological region of interest. A heat map, generated using  
337 Seaborn (V0.9.0), displayed the cell counts per mm<sup>2</sup> of tissue.

338

339 *Generation of distance map.* To assess the location of identified cells relative to blood vessels,  
340 collagen<sup>+</sup> perivascular regions of >10 $\mu$ m diameter and >800  $\mu$ m<sup>2</sup> area were segmented, and the  
341 distance between cells of interest and the border of these perivascular regions was calculated.  
342 Similarly to the cellular density calculations, average vessel distances corresponding to the mean of  
343 the per-cell vessel distance values were computed, expressed in  $\mu$ m, and presented as a distance

344 heat map. Some regions did not contain any cells of a particular type, leading to undefined values  
345 for those particular regions and cell type combinations (presented as “n/a”, not applicable).

346

347 **Statistical analysis.** Where statistical testing was possible, all tests were performed using  
348 Prism software (v5.01; GraphPadSoftware, San Diego, CA). Data distribution was tested for  
349 normality. Because all variables were not normally distributed, possible correlations between  
350 the density of nuclei or the density of CD3<sup>+</sup> cells (number of cells / mm<sup>2</sup> of tissue) detected  
351 either by IF or by IMC, were investigated with the nonparametric Spearman rank correlation.  
352 Differences were considered significant at  $p < 0.05$ .

353



## 354 RESULTS

### 355 Comparability of IF versus IMC approach and specificity of metal-conjugated antibodies

356 **on brain-resident cell types.** In this study, we performed two separate IMC runs on the same  
357 patient and control tissue. The first run (Figure 1-2) was to validate our panel and the approach  
358 in general. The second run (Figure 3-7) was to evaluate the composition of immune cells across  
359 several types of lesions and sub-lesional areas. To evaluate the validity of IMC for the analysis  
360 of post-mortem MS brain tissue, we first investigated whether images generated by IMC  
361 revealed a similar number of cells expressing a given marker in a mm<sup>2</sup> area of tissue, as  
362 determined by IF. We used IF or IMC on serial sections from the same tissue block. Sections  
363 were stained with DAPI (IF) or Iridium-intercalator (IMC) to identify DNA in the nuclei, and  
364 with anti-CD3-FITC (IF) or anti-CD3-170Er (IMC) to identify CD3<sup>+</sup> T cells. Imaging of  
365 equivalent ROI in IF- and IMC-stained sections showed similar staining patterns with clearly  
366 resolved anatomical regions (**Figure 1a**). We also showed that IMC is able to resolve myelin  
367 engulfed by microglia/macrophages with a similar pattern as what is observed using IHC and  
368 IF approaches (**Figure 1 – Supplement Figure 3**). Quantification analysis showed that the  
369 number of nuclei or CD3<sup>+</sup> T cells detected by IMC is on average 1.4 and 1.5 fold higher than  
370 numbers detected by IF, respectively. The increase in detection of cell counts across ROI for  
371 DNA and for CD3 using the IMC method compared to IF is either due to the necessary use of  
372 a serial section for comparison between the two techniques, or alternatively IMC may be a  
373 more sensitive approach for detecting nucleated cells within brain tissue. We also compared  
374 the number of nuclei identified with DAPI by IF and the number of nuclei identified with  
375 intercalator by IMC, as well as the number of CD3<sup>+</sup> T cells identified with FITC-labeled  
376 secondary antibody by IF and the number of CD3<sup>+</sup> T cells identified with the 170Er metal-tag  
377 by IMC. Both comparisons revealed a significant positive correlation (Spearman correlation  
378 coefficient:  $r=0.9182$ ,  $p=0.0002$  and  $r=0.8929$ ,  $p=0.01$ , for nuclei and for CD3<sup>+</sup> T cells

379 respectively) (**Figure 1b, c**), indicating proportional representation of brain-resident cells was  
380 in agreement for both methods. Collectively, IMC reproduces staining patterns that are in  
381 agreement with those produced using a standard IF method in MS brain tissue.

382

383 Second we assessed the target specificity of metal-tagged antibodies by IMC. We stained brain  
384 tissue with metal-tagged antibodies against molecules that are either expected to be co-  
385 expressed by cells or whose cellular expression is expected to be mutually exclusive. IMC  
386 imaging of the edge of an active demyelinating lesion identified CD3<sup>+</sup>CD45<sup>+</sup> T cells and CD3<sup>-</sup>  
387 CD45<sup>+</sup> leukocytes other than T cells (**Figure 2a**). The co-expression of CD68 in the latter cell  
388 types identifies these as microglia/macrophages (CD3<sup>-</sup>CD45<sup>+</sup>CD68<sup>+</sup>) (**Figure 2b**). As  
389 expected, CD3<sup>+</sup> T cells lack expression of immunoglobulin light chain, (CD3<sup>+</sup>κ/λ<sup>-</sup>). Since  
390 antibodies directed to the B cell-restricted lineage markers CD19 and CD20 were sub-optimal  
391 on our brain tissues, we relied instead on antibodies that detect the two allelic variants of the  
392 immunoglobulin light chain (κ/λ). This provided two advantages: the ability to capture all B  
393 cells, irrespective of their maturation/activation status (for example, plasma cells downregulate  
394 CD19/CD20) and the ability to test specificity of our B cell directed reagents since κ and λ are  
395 allelically excluded on the surface of B cells. As expected, we identified B cells that were either  
396 positive for the κ or the λ light chain of immunoglobulins and negative for the CD3 marker of  
397 T cells and the CD68 marker of macrophages (for example, CD3<sup>-</sup>CD68<sup>-</sup>κ<sup>+</sup> B cells in **Figure 2c**  
398 **arrow**, versus CD3<sup>-</sup>CD68<sup>-</sup>λ<sup>-</sup> B cells in **Figure 2d arrow** and vice versa CD3<sup>-</sup>CD68<sup>-</sup>κ<sup>-</sup> B cells  
399 in **Figure 2c arrow head**, versus CD3<sup>-</sup>CD68<sup>-</sup>λ<sup>+</sup> B cells in **Figure 2d arrow head**). We found  
400 that the extracellular matrix protein collagen (not cell-associated) surrounded putative blood  
401 vessels lined by endothelial cells that expressed the CD31 marker as expected. In contrast,  
402 macrophages visualized by CD68 do not stain positive for collagen nor express CD31 (CD31<sup>-</sup>  
403 collagen<sup>-</sup>CD68<sup>+</sup>) (**Figure 2e**). Lastly, we asked whether the IMC approach would have

404 sufficient sensitivity to detect soluble molecules that can be rare in tissues. For this, we used  
405 an antibody against granzyme B, a serine protease with pro-inflammatory function produced  
406 by activated cytotoxic T cells. IMC identified a granzyme B<sup>+</sup> signal with granular expression  
407 in close proximity to nuclei (**Figure 2f, g**). These results show that IMC enables imaging of  
408 multiple markers on a single tissue section reproducing IF-equivalent staining patterns and with  
409 cell lineage-specific markers expressed on appropriate cell types.

410

411 **Qualitative staging of MS lesions by IMC.** To verify whether IMC provides us with the  
412 ability to differentiate normal-appearing tissue versus different lesional stages of the MS brain,  
413 we analysed the proteolipid protein (PLP) signal that visualizes myelin and the human  
414 leukocyte antigen (HLA) signal that visualizes antigen presenting cells (**Figure 3**). Note that  
415 in some ROI, the PLP staining pattern reflects the cross-sectional orientation of myelinated  
416 fibers (for example WMC and NAWM), whereas in others, longitudinal myelin tracks are  
417 observed (for example (p)reactive). The different orientation of the tissue results from the  
418 sectioning plane of the tissue block and is reflected in the staining pattern displayed. Consistent  
419 with the generally non-inflamed and myelinated state of healthy white matter, control white  
420 matter showed intact myelin staining with few HLA<sup>+</sup> cells (**Figure 3 a, b**). Normal appearing  
421 white matter (NAWM) in the MS brain exhibited normal myelin staining, however HLA<sup>+</sup> cells  
422 within the MS NAWM appeared enriched when compared to control white matter (**Figure 3 c,**  
423 **d**). Similarly, the (p)reactive lesion showed a normal myelin signal but HLA<sup>+</sup> cells accumulated  
424 at this site (**Figure 3 e, f**). The active lesion core showed loss of PLP signal with accumulation  
425 of HLA<sup>+</sup> cells (**Figure 3 g, h**). The mixed active-inactive lesions showed reduced myelin and  
426 accumulation of HLA<sup>+</sup> cells at the lesion edge (**Figure 3 i, j**). HLA<sup>+</sup> cells that contained PLP  
427 myelin products were found in both active lesions[26] (**Figure 3k**) and at the edge of mixed  
428 active-inactive lesions (**Figure 3l**), indicative of demyelinating activity. Collectively we were

429 able to show that IMC of different ROI (pre-selected on the bases of PLP/HLA IF staining on  
430 a serial section) was able to differentiate between normal-appearing tissue and different  
431 lesional stages of the MS brain.

432

433 **Qualitative assessment of microglia and macrophages in staged MS lesions by IMC.** Next,  
434 we analysed key molecules that differentiate between the phenotype and functional status of  
435 microglia and macrophages in relation to the lesional stage and demyelinating activity of MS  
436 lesions.

437 *Control subject white matter.* In the white matter from a control subject we found that  
438 microglia, identified as being TMEM119<sup>+</sup>, generally showed a thin ramified morphology,  
439 typical of resting cells (**Figure 4 a, a' dotted arrows**). On these cells, the HLA marker of  
440 antigen presentation was generally low or not detectable, confirming a quiescent state. On the  
441 contrary, TMEM119<sup>+</sup> microglia that showed a more rounded morphology, which is a sign of  
442 activation, also stained for HLA and CD68 (**Figure 4 a, a' arrow head and b, b' arrow head**).  
443 HLA/CD68 expression is indicative of antigen presentation and phagocytic activity,  
444 respectively. TMEM119<sup>-</sup>HLA<sup>+</sup>CD68<sup>+</sup> cells were identified as macrophages and were also  
445 present in the white matter of control (**Figure 4 a, a' arrow and b, b' arrow**). These data  
446 indicate that in the normal white matter of a control subject some microglia (TMEM119<sup>+</sup>) and  
447 some macrophages (TMEM119<sup>-</sup>) have an activated phenotype (HLA<sup>+</sup>CD68<sup>+</sup>).

448 *Normal-appearing white matter.* Visualization of the expression pattern of microglia and  
449 macrophage markers in the normal-appearing white matter showed some TMEM119<sup>+</sup>  
450 microglia with ramified morphology (**Figure 4 c, c' dotted arrows**), similar to control white  
451 matter. However unlike control white matter, the normal-appearing white matter showed many  
452 TMEM119<sup>+</sup> microglia that were also positive for HLA and CD68 (**Figure 4 c, c' arrows head**

453 **and d, d' arrows head**). A few TMEM119<sup>+</sup>HLA<sup>+</sup>CD68<sup>+</sup> macrophages were also present in the  
454 normal-appearing tissue (**Figure 4 c, c' arrow and d, d' arrow**).

455 *(P)reactive lesions*. Within the (p)reactive lesions, TMEM119<sup>+</sup> microglia accumulated,  
456 showed an enlarged morphology that is indicative of an activated state, and expressed both  
457 HLA and CD68 (**Figure 4 e, e' and e'' arrows head and f, f' arrows head**). TMEM119<sup>-</sup>  
458 HLA<sup>+</sup>CD68<sup>+</sup> macrophages were also present (**Figure 4 e, e' arrows and f, f' arrows**).

459 *Active lesions*. Active lesions contained high numbers of TMEM119<sup>+</sup>HLA<sup>+</sup>CD68<sup>+</sup> microglia  
460 and TMEM119<sup>-</sup>HLA<sup>+</sup>CD68<sup>+</sup> macrophages, most of them with enlarged and foamy  
461 morphology that is typical of the activated and phagocytic state (**Figure 4 g, g' and g'' arrows**  
462 **and h, h' arrows**).

463 *Mixed active-inactive lesion (slowly expanding lesion)*. The edge of these lesions was  
464 characterized by a rim of dense TMEM119<sup>+</sup>HLA<sup>+</sup> microglia (**Figure 4 i, i' arrow head and j,**  
465 **j' arrow head**) and TMEM119<sup>-</sup>HLA<sup>+</sup> macrophages (**Figure 4 i, i' arrows and j, j', j''**  
466 **arrows**), both with obvious enlarged CD68<sup>+</sup> lysosomes (**Figure 4 j'' arrows**). Only a few  
467 HLA<sup>+</sup>CD68<sup>+</sup> cells were present in the inactive lesion core and microglia showed profound  
468 reduction in the HLA signal (**Figure 4 i, i' arrows and j, j', j'' arrows**).

469

470 **Qualitative assessment of T cells in staged MS lesions by IMC**. Next, we analysed key  
471 molecules that differentiate between the phenotype and functional status of T cells in relation  
472 to the lesional stage and demyelinating activity of MS lesions.

473 *Control subject white matter*. In the white matter from a control subject CD3<sup>+</sup>CD8 $\alpha$ <sup>-</sup> T cells or  
474 CD3<sup>+</sup>CD8 $\alpha$ <sup>+</sup> T cells were rare or absent (**Figure 5 a, a' and b, b'**).

475 *Normal-appearing white matter*. In the normal-appearing white matter, we identified some  
476 CD3<sup>+</sup>CD8 $\alpha$ <sup>-</sup> T cells (**Figure 5 c, c' arrow**) and some CD3<sup>+</sup>CD8 $\alpha$ <sup>+</sup> T cells (**Figure 5 c, c'**  
477 **dotted arrow**) that did not show signs of activation as defined by the expression of NFAT1

478 which translocates to the nucleus of T cells upon T cell receptor activation[30] (**Figure 5 d, d'**  
479 **arrow and dotted arrow**).

480 (*P*)*reactive lesions*. Within the (p)reactive lesions, CD3<sup>+</sup>CD8 $\alpha$ <sup>-</sup> and CD3<sup>+</sup>CD8 $\alpha$ <sup>+</sup> T cells were  
481 both prominent (**Figure 5 e, e' arrow and dotted arrow, respectively**) but did not stain for  
482 NFAT1 and were therefore presumably not activated (**Figure 5 f, f' arrow and dotted arrow,**  
483 **respectively**).

484 *Active lesions*. Active lesions contained both, CD3<sup>+</sup>CD8 $\alpha$ <sup>-</sup> and CD3<sup>+</sup>CD8 $\alpha$ <sup>+</sup> T cells (**Figure 5**  
485 **g, g' arrow and dotted arrow, respectively**), mostly located in the perivascular area (**Figure**  
486 **5 g' inset**), but also scattered in the parenchyma. Some CD3<sup>+</sup>CD8 $\alpha$ <sup>+</sup> T cells were also activated  
487 based on the expression of NFAT1 (**Figure 5 h, h' arrow head**).

488 *Mixed active-inactive lesion (slowly expanding lesion)*. Similar to the core of active lesions,  
489 the edge of the slowly expanding lesions contained both, CD3<sup>+</sup>CD8 $\alpha$ <sup>-</sup> and CD3<sup>+</sup>CD8 $\alpha$ <sup>+</sup> T cells  
490 (**Figure 5 i, i' arrow and dotted arrow, respectively**). A few CD3<sup>+</sup>CD8 $\alpha$ <sup>-</sup> T cells and some  
491 CD3<sup>+</sup>CD8 $\alpha$ <sup>+</sup> T cells were also NFAT1<sup>+</sup> (**Figure 5 j, j' white arrow and yellow arrow head,**  
492 **respectively**). These were found both in the perivascular area and in the parenchyma (**Figure**  
493 **5 j''**). The staining pattern of NFAT1 was consistent with the nuclear localization of this  
494 transcription factor (**Figure 5 k-n**). Nuclear NFAT1 signal was also observed on CD3<sup>-</sup> cells,  
495 consistent with reports of its localization of cells other than T cells[30] (**Figure 5 h, h' and j,**  
496 **j' white arrows head**). Occasionally, we observed Ki67<sup>+</sup> proliferating cells (**Figure 5 o,**  
497 **arrow and inset**), some of which were CD3<sup>+</sup> T cells (**Figure 5 o, dotted arrow**). In the inactive  
498 lesion core, we observed both scattered CD3<sup>+</sup>CD8 $\alpha$ <sup>-</sup> T cells and CD3<sup>+</sup>CD8 $\alpha$ <sup>+</sup> T cells (**Figure 5**  
499 **i**).

500

501 **Qualitative assessment of B cells in staged MS lesions by IMC.** Next we analysed key  
502 molecules that differentiate between the phenotype and functional status of B cells in relation  
503 to the lesional stage and demyelinating activity of MS lesions.

504 *Control subject white matter.* IgM staining on cells can be indicative of either naive B  
505 lymphocytes or IgM memory B cells. Therefore we first analysed the tissue for the presence of  
506 cell-associated IgM staining signal. In control white matter, IgM was not found in association  
507 with cells in the parenchyma but was only found in association with blood vessels, identified  
508 by the collagen staining. Further analysis showed that the IgM signal in the perivascular space  
509 co-localizes with the immunoglobulin light chain Ig $\kappa$ /Ig $\lambda$ , indicating that this IgM<sup>+</sup> Ig $\kappa$ /Ig $\lambda$ <sup>+</sup>  
510 signal represents either naive or IgM memory B cells, or alternatively cell-free  
511 immunoglobulins (**Figure 6 a, a' and b, b' arrow head**).

512 *Normal-appearing white matter.* In the normal-appearing white matter, the IgM signal was  
513 found both in association with blood vessels (**Figure 6 a, a' and b, b' arrow head**) and with  
514 nucleated Ig $\kappa$ /Ig $\lambda$ <sup>+</sup> B cells scattered in the parenchyma (**Figure 6 a, a' and b, b' dotted**  
515 **arrows**). Nucleated Ig $\kappa$ /Ig $\lambda$ <sup>+</sup> B cells that were IgM<sup>-</sup> were also found in the parenchyma (**Figure**  
516 **6 a, a' and b, b' solid arrows**) indicating the presence of class switched B cells.

517 *(P)reactive lesions.* Within the (p)reactive lesions, IgM was exclusively detected within blood  
518 vessels (**Figure 6 e, e' arrow head**). Nucleated Ig $\kappa$ /Ig $\lambda$ <sup>+</sup> B cells were present and expressed a  
519 switched B cell phenotype (IgM<sup>-</sup>) (**Figure 6 e, e' and f, f' solid arrows**).

520 *Active lesions.* Within the active lesions, nucleated Ig $\kappa$ /Ig $\lambda$ <sup>+</sup> B cells that displayed a switched  
521 phenotype (IgM<sup>-</sup>) were mostly present (**Figure 6 g, g' and h, h' solid arrows**).

522 *Mixed active-inactive lesion (slowly expanding lesion).* Similarly to active lesions, at the edge  
523 of mixed active-inactive lesions, nucleated Ig $\kappa$ /Ig $\lambda$ <sup>+</sup> B cells were present and displayed a  
524 switched memory phenotype (IgM<sup>-</sup>) (**Figure 6 i, i' and j, j' solid arrows**).

525

526 **15-plex quantification of immune cells in staged MS lesions by IMC.** Following the  
527 visualization of markers of interest in tissue sections by IMC, we pre-set thresholds for each  
528 marker and analysed combinations of markers that identify the phenotype and functional status  
529 of immune cells, as shown in **Figure 7 – Supplement Figure 2**. Focusing on the MS tissue, we  
530 assembled these data into heat maps to visualize quantitatively the cellular content of each  
531 region of interest (**Figure 7a**).

532 *Macrophages and microglia.* CD45<sup>high</sup>HLA<sup>+</sup>TMEM<sup>-</sup> macrophages were found in the normal-  
533 appearing white matter and a low density of macrophages (3 cells/mm<sup>2</sup>) contained PLP within  
534 their CD68<sup>+</sup> lysosomes, indicative of demyelinating activity. The number of demyelinating  
535 CD45<sup>high</sup>HLA<sup>+</sup>TMEM<sup>-</sup>CD68<sup>+</sup>PLP<sup>+</sup> macrophages drastically increased in the (p)reactive  
536 lesions (34.8 cells/mm<sup>2</sup>), reaching peak density in the core of active lesions (36.5 cell/mm<sup>2</sup>)  
537 and edge of active-inactive demyelinating lesions (50.5 cell/mm<sup>2</sup>). In the active core we also  
538 found a high density (92.6 cell/mm<sup>2</sup>) of CD45<sup>high</sup>HLA<sup>+</sup>TMEM<sup>-</sup>CD68<sup>+</sup>PLP<sup>-</sup> macrophages,  
539 which represent phagocytes with enlarged but empty vacuoles.

540 Similarly to demyelinating CD45<sup>high</sup>HLA<sup>+</sup>TMEM<sup>-</sup>CD68<sup>+</sup>PLP<sup>+</sup> macrophages, demyelinating  
541 CD45<sup>low</sup>HLA<sup>+</sup>TMEM<sup>+</sup>CD68<sup>+</sup>PLP<sup>+</sup> microglia were found in high numbers in the (p)reactive  
542 lesions with peak density in the core of active lesions (249.5 cell/mm<sup>2</sup>) and edge of active-  
543 inactive demyelinating lesions (403.3 cell/mm<sup>2</sup>). Also in line with the distribution of non-  
544 demyelinating macrophages, a high density (224.9 cell/mm<sup>2</sup>) of non-demyelinating  
545 CD45<sup>low</sup>HLA<sup>+</sup>TMEM<sup>+</sup>CD68<sup>+</sup>PLP<sup>-</sup> microglia with empty vacuoles were found in the core of  
546 active lesions. Overall, we found that in the core of active lesions on average 79% of HLA<sup>+</sup>  
547 cells are microglia and that they constitute 87% of the actively demyelinating (PLP<sup>+</sup>)  
548 phagocytes. In the edge of a mixed active-inactive demyelinating lesion, we found that on  
549 average 88% of HLA<sup>+</sup> cells are microglia and that they constitute 89% of actively  
550 demyelinating (PLP<sup>+</sup>) phagocytes.



551 *T cells.* Both CD45<sup>high</sup>CD3<sup>+</sup>CD8 $\alpha$ <sup>+</sup>CD4<sup>-</sup> (CD8) T cells and CD45<sup>high</sup>CD3<sup>+</sup>CD8 $\alpha$ <sup>-</sup>CD4<sup>+</sup> (CD4)  
552 T cells were abundant in the MS tissue from the (p)reactive lesional stage (CD8, 53.4  
553 cells/mm<sup>2</sup>, CD4, 49.7 cells/mm<sup>2</sup>) with peak densities in the core of active lesions (CD8, 58.6  
554 cells/mm<sup>2</sup>, CD4, 38.5 cells/mm<sup>2</sup>), the periplaque (CD8, 92.3 cells/mm<sup>2</sup>, CD4, 32.2 cells/mm<sup>2</sup>)  
555 and the rim (CD8, 43.2 cells/mm<sup>2</sup>, CD4, 68.8 cells/mm<sup>2</sup>) of mixed active-inactive lesions.  
556 Overall, we found that in the core of active lesions on average 60% of T cells are CD8<sup>+</sup>, 3% of  
557 which are activated and proliferating (NFAT<sup>+</sup>Ki67<sup>+</sup>). On the contrary, in the edge of a mixed  
558 active-inactive lesion, we found that on average 61% of T cells are CD4<sup>+</sup>, 17% of which are  
559 activated and proliferating (NFAT<sup>+</sup>Ki67<sup>+</sup>). We verified these findings by examining an  
560 independent combination of markers – co-expression of CD38 and HLA on both CD4<sup>+</sup> and  
561 CD8<sup>+</sup> T cells is associated with T cell activation in the context of viral infection[43]. We found  
562 that CD4<sup>+</sup>CD38<sup>+</sup>HLA<sup>+</sup> and CD8<sup>+</sup>CD38<sup>+</sup>HLA<sup>+</sup> were likewise enriched in the core of the active  
563 lesion and the edge of the active/inactive lesion with CD4<sup>+</sup>CD38<sup>+</sup>HLA<sup>+</sup> T cells being  
564 particularly represented at the edge of the active/inactive lesion. However unlike the  
565 NFAT<sup>+</sup>Ki67<sup>+</sup> T cells, CD38<sup>+</sup>HLA<sup>+</sup> T cells were present in particularly high density in the  
566 (p)reactive lesion.

567 *B cells.* Using the CD38 marker, we were able to further define B cells sub-populations beyond  
568 the qualitative images in **Figure 6**. We found B cells across all lesion types with switched  
569 memory CD45<sup>high</sup>Ig $\kappa$ /Ig $\lambda$ <sup>+</sup>IgM<sup>-</sup>CD38<sup>+</sup> B cells predominating in the core of active lesions (29.2  
570 cells/mm<sup>2</sup>, 58% of all detected B cells) and periplaque white matter (22.2 cells/mm<sup>2</sup>, 87% of  
571 all detected B cells) and at the lesion rim (44.0 cells/mm<sup>2</sup>, 44% of all detected B cells) of  
572 mixed active inactive lesions.

573

574 **Analysis of the distribution of immune cells in staged MS lesions by IMC.** Since the  
575 distribution of blood-derived immune cells in relation to blood vessels can inform on the

576 relationship between immune infiltrates and tissue injury, we performed a morphometric  
577 analysis of the distance between functional cell types and blood vessels in different MS lesion  
578 areas (**Figure 7b**).

579 *Macrophages*. We found that demyelinating CD45<sup>high</sup>HLA<sup>+</sup>TMEM<sup>-</sup>CD68<sup>+</sup>PLP<sup>+</sup> macrophages  
580 infiltrated the lesion parenchyma in (p)reactive lesions (average distance from blood vessels,  
581 136 $\mu$ m) and periplaque white matter (average distance from blood vessels, 131-191 $\mu$ m),  
582 indicating that demyelinating events occur already in tissue that does not show obvious signs  
583 of demyelination. Demyelinating macrophages were mostly found in close proximity to blood  
584 vessels in active demyelinating lesions (average distance from blood vessels, 87 $\mu$ m) and at the  
585 edge of active-inactive demyelinating lesions (average distance from blood vessels, 70 $\mu$ m).  
586 Non-demyelinating CD45<sup>high</sup>HLA<sup>+</sup>TMEM<sup>-</sup>CD68<sup>+</sup>PLP<sup>-</sup> macrophages were found within the  
587 lesion parenchyma in both active lesions (average distance from blood vessels, 107 $\mu$ m) and  
588 active-inactive lesions (edge: average distance from blood vessels, 244 $\mu$ m; core:average  
589 distance from blood vessels, 279 $\mu$ m), representing phagocytes that are no longer actively  
590 demyelinating.

591 *T cells*. In (p)reactive and periplaque white matter, both CD8<sup>+</sup> and CD4<sup>+</sup> T cells infiltrated the  
592 parenchyma (CD8<sup>+</sup> T cells: average distance from blood vessels, 114-238 $\mu$ m; CD4<sup>+</sup> T cells:  
593 average distance from blood vessels, 80-208 $\mu$ m). At the edge (CD8<sup>+</sup> T cells: average distance  
594 from blood vessels, 45 $\mu$ m; CD4<sup>+</sup> T cells: average distance from blood vessels, 21 $\mu$ m) and core  
595 (CD8<sup>+</sup> T cells: average distance from blood vessels, 121 $\mu$ m; CD4<sup>+</sup> T cells: average distance  
596 from blood vessels, 89 $\mu$ m) of active-inactive lesions, CD4<sup>+</sup> T cells were located in closer  
597 proximity to blood vessels compared to CD8<sup>+</sup> cells, which instead appeared to diffusely  
598 infiltrate the lesional parenchyma. CD8<sup>+</sup> and CD4<sup>+</sup> T cells were found to equally infiltrate the

599 parenchyma in active lesions (CD8<sup>+</sup> T cells: average distance from blood vessels, 89 $\mu$ m; CD4<sup>+</sup>  
600 T cells: average distance from blood vessels, 88 $\mu$ m).

601 *B cells.* We found that naïve CD45<sup>high</sup>Ig $\kappa$ /Ig $\lambda$ <sup>+</sup>IgM<sup>+</sup>CD38<sup>-</sup> B cells and switched memory  
602 CD45<sup>high</sup>Ig $\kappa$ /Ig $\lambda$ <sup>+</sup>IgM<sup>-</sup>CD38<sup>+</sup> B cells infiltrated the parenchyma in both (p)reactive lesions  
603 (naïve B cells: average distance from blood vessels, 62 $\mu$ m; memory switched B cells: average  
604 distance from blood vessels, 92 $\mu$ m) and periplaque white matter (naïve B cells: average  
605 distance from blood vessels, 71 $\mu$ m; memory switched B cells: average distance from blood  
606 vessels, 103-113 $\mu$ m). Within lesions, naïve B cells were focally located in the perivascular  
607 space of veins at the the edge (average distance from blood vessels, 2 $\mu$ m) and core (average  
608 distance from blood vessels, 9 $\mu$ m) of active-inactive lesions. Switched memory  
609 CD45<sup>high</sup>Ig $\kappa$ /Ig $\lambda$ <sup>+</sup>IgM<sup>-</sup>CD38<sup>+</sup> B cells were present in the vicinity of blood vessels at the rim  
610 (average distance from blood vessels, 44 $\mu$ m) and core (average distance from blood vessels,  
611 19 $\mu$ m) of active-inactive lesions but were found to also diffusely infiltrate the parenchyma of  
612 active lesions (average distance from blood vessels, 82 $\mu$ m).

## 613 **DISCUSSION**

614 In this study we used imaging mass cytometry to multiplex 15+ markers to stain a single  
615 tissue section. The panel contained both cell-specific and functional markers, and enabled the  
616 analysis of single-cell phenotypes and functional states of resident microglia, blood-derived  
617 (recruited) macrophages, T and B lymphocytes in demyelinating and highly inflammatory  
618 lesions in a case of severe rebound MS disease activity after natalizumab cessation[26]. We  
619 first showed the validity of the technology on post-mortem MS brain tissue and then applied  
620 it to the analysis of immune cells in the lesions compared to control brain tissue.

621

622 IMC reproduced IHC- and IF-equivalent staining patterns with no apparent changes in  
623 specificity compared to standard IF. Therefore, antibodies validated with IF for the study of  
624 the MS brain will likely be applicable to the IMC approach. It should be noted, however,  
625 that the concentration and the staining conditions of some IHC- or IF-verified antibodies  
626 may not be implemented as is into the IMC protocol: titration and/or amplification (for  
627 example with biotin-streptavidin) of pathologist-verified antibodies is required for optimal  
628 visualization by IMC.

629

630 In addition to visualizing a multitude of cell types, IMC allows for inclusion and exclusion  
631 criteria of selected markers to provide better confidence of cell identity. Furthermore, the  
632 highly quantitative nature of the IMC approach enables the analyses of data with pre-set  
633 thresholds for each marker, and permits further validation based on combination  
634 (inclusion/exclusion) with other markers. For example, we were able to distinguish CD45<sup>high</sup>  
635 cells that were TMEM119<sup>-</sup>CD68<sup>+</sup> thus identifying macrophages *versus* CD45<sup>low/+</sup> cells that  
636 were TMEM119<sup>+</sup>CD68<sup>+</sup> thus identifying microglia.

637

638 We found that in the control brain, microglial cells lose their homeostatic phenotype and  
639 acquire an activated state. This is in line with an earlier study demonstrating expression of  
640 certain activation markers by microglia within the normal human brain, and it is in agreement  
641 with recent immunohistological findings that show no expression of the homeostatic molecule  
642 P2RY12[42] in 48% of microglia in control brains[44]. Whether this activation state is the  
643 result of systemic exposure to recurrent infections[33] or is the result of vascular and  
644 neurodegenerative changes related to normal ageing[11] (the control subject was 86 years), or  
645 whether it is an inherent property of microglia in the human brain[44], is unclear.

646

647 In line with recent observations in carefully staged lesions from a large cohort of MS patients  
648 at well-defined disease stages[44], we found that microglial activation was not restricted to  
649 lesional tissue but was also present in the normal-appearing white matter and  
650 (p)reactive lesion site. In these regions, although myelination appeared normal, we also found  
651 that demyelinating blood-derived macrophages infiltrated the parenchyma. In active lesions  
652 and in the active edge of mixed active-inactive demyelinating lesions[25] (slowly expanding  
653 or ‘smouldering’[15]), microglia and macrophages displayed similar phenotypic changes  
654 characterized by the predominant expression of markers associated with activation and  
655 phagocytosis. In contrast, in the core of mixed active-inactive demyelinating lesions, microglia  
656 and macrophages lost expression of molecules involved in antigen presentation and drastically  
657 reduced their phagocytic activity, as previously described[44]. Notably, a large proportion (on  
658 average 88%) of demyelinating macrophage-like cells in active lesions and at the edge of  
659 mixed active-inactive lesions were derived from the resident microglial pool, whereas  
660 macrophages that infiltrated the parenchyma of these lesional areas were largely inactive as  
661 indicated by the presence of enlarged but empty vacuoles in these cells. This is likely the result

662 of the macrophage's inability to digest the myelin's neutral lipid components that accumulate  
663 and persist in macrophages.

664

665 In terms of lymphocytes, in classical active lesions and mixed active-inactive demyelinating  
666 lesions we showed that T cells were abundant. Although CD8<sup>+</sup> T cells generally predominated  
667 across lesional stages, and in some cases proliferated (as also shown in a recent study[31]),  
668 interestingly we found a conspicuous number of CD4<sup>+</sup> T cells not only within lesions but also  
669 at the (p)reactive lesion site and periplaque white matter. In addition, CD4<sup>+</sup>CD38<sup>+</sup>HLA<sup>+</sup>  
670 “chronically activated” T cells[43] were also particularly abundant in the (p)reactive lesion  
671 site. This suggests an involvement of these cells in the early stages of lesion formation, even  
672 in established lesions. Similar to other findings in the case of T lymphocytes, our data also  
673 reproduced immunohistological findings that described B lymphocytes in all lesion stages in  
674 lower numbers compared to T cells [31]. By using IgM in combination with CD38 and κ/λ,  
675 our panel has the increased capacity of identifying different B cell subsets . Indeed, by using  
676 IgM in combination with CD38 and κ/λ, our panel has revealed different B cell subsets,  
677 including IgM<sup>+</sup> and switched memory B cells.

678

679 With the IMC approach, we were able to reproduce findings by Machado-Santos et al wherein  
680 they proposed that although active demyelination is associated with activated blood-derived  
681 macrophages, it is largely driven by the resident activated microglial pool[44]. This was also  
682 suggested by earlier studies[27], pointing to the possibility that therapeutic interventions aimed  
683 at blocking entry of myeloid cells from the circulation into the brain parenchyma may be  
684 insufficient to halt the disease process.

685

686 It has been suggested that CD8<sup>+</sup> T cells in lesions from patients with relapsing, progressive and  
687 fulminant acute MS show features of tissue-resident memory cells and play a central role in  
688 the establishment of tissue-specific immunological memory, propagating chronic  
689 compartmentalized inflammation and tissue damage in the MS brain by local activation  
690 following re-exposure to their cognate antigen[31]. B cells are also detected in all MS lesion  
691 types but their localization seems to be restricted to the perivascular space of some veins[31].  
692 Machado-Santos et al have shown that the majority of B and T cells are present in the  
693 perivascular cuffs, distant from sites of initial myelin damage[31]. This supports the possibility  
694 that demyelination is induced by soluble factors produced by lymphocyte which diffuse into  
695 the tissue and in turn activate phagocytes. Our findings from a single MS case with high  
696 inflammatory activity only incompletely reproduce these findings. While we also observed  
697 perivascular localization of B and T cells, these lymphocytes were also found to diffusely  
698 infiltrate the lesion parenchyma, which could support a contact-mediated active demyelination,  
699 at least in this MS case. However, due to the nature of the acquired region of interest, which  
700 doesn't capture the areas surrounding the site of ablation, it is possible that blood vessels were  
701 positioned immediately outside the region of interest. These would be missed in the cell-blood  
702 vessel distance analysis, which would result in considering cells that may in reality have a  
703 perivascular localization, as been located far from blood vessels. Further analysis of larger  
704 areas across multiple tissue samples are required to better answer this question.

705

706 A comprehensive phenotypic characterization of B cells in MS tissue is lacking and the role of  
707 B cells in MS lesions is currently unresolved. Recent clinical studies have reported a protective  
708 effect of therapies targeting CD20<sup>+</sup> B cells in MS patients, suggesting a major role for B cells  
709 in the disease process[20,21]. Our IMC results allowed for better segregation of B cell  
710 phenotypes (memory, class switched etc). Further addition of other markers, particularly for

711 plasma cells (such as CD138, TACI) will be important for a full characterization of B cell  
712 subsets within the MS brain. This is particularly relevant in light of recent findings that  
713 demonstrate that some B lineage cells play a protective role in neuroinflammatory  
714 processes[37].

715

716 While IMC has the advantage of multiplexing capability, it also has limitations. For example,  
717 it yields information only about the brain region imaged and is low throughput. It is therefore  
718 possible that different cell populations can exist in brain regions and sublesional areas other  
719 than those imaged. As is the case for the analysis of tissue stained with standard IHC/IF  
720 methods, multiple regions must be acquired. Another limitation, that seems apparent from the  
721 tissue that we examined, is that cell densities by IMC were higher than those derived by IF  
722 (**Figure 1**). This may be due to the fact that we had to use a serial section to compare the two  
723 methods, with the two sections containing slightly different numbers of cells. Alternatively,  
724 IMC may have an increased sensitivity in brain tissue compared to IF. However, in spite of  
725 these differences, the proportionality of the output signal for IMC vs IF was consistent across  
726 samples (Figure 1 and [9]). In addition, our study has the limitation that it is based on the  
727 analysis of immune cells in lesions from a single MS. Our goal was not to uncover novel cell  
728 populations in the MS brain, but rather to provide proof that the IMC technology can be used  
729 as a powerful tool for the analysis of complex cellular phenotypes in heterogeneous tissues  
730 such as the MS brain. Moreover, given that the cells in these lesions had known phenotypes,  
731 the supervised approach for thresholding used herein was reasonable. However in the future,  
732 unsupervised analysis of data sets generated using the IMC approach may identify novel cell  
733 types in tissue that is understudied, for example the MS meninges. In addition, discovery of  
734 novel cell types using a technique such as IMC can then be recapitulated with standard  
735 techniques using multiple well-characterized specimens from established brain banks.



736

737 Overall, our data reproduced immunohistological patterns of microglia and lymphocytes  
738 activation described in carefully staged MS brain lesions at well-defined disease stages[31,44]  
739 using a multi-parameter approach. The significance of observed B cells of IgM memory and  
740 class switch memory phenotypes, warrant further study. We propose that IMC will enable a  
741 high dimensional analysis of single-cell phenotypes along with their functional states, as  
742 well as cell-cell interactions in relation to lesion morphometry and (demyelinating) activity.  
743 The IMC approach in combination with existing imaging techniques, can profoundly  
744 impact our knowledge of the nature of the inflammatory response and tissue injury in the  
745 multiple sclerosis brain.

746

747 **Acknowledgements.** We would like to thank the brain donors.

748

749 **Competing interest.** J.L.G. is a consultant for Roche (Canada) and currently holds grants  
750 with Novartis, EMD Serono, and Roche. V.R. received a consulting honorarium from  
751 EMD Serono. O.O. and E.C.S. are employees of Fluidigm Inc. The remaining authors declare  
752 no competing interest.

753

754 **Author contributions.** V.R. performed the pathological characterization for the MS lesions,  
755 guided the acquisition of the IMC data and contributed to data analysis. S.S.M. performed the  
756 IF and IMC staining, and contributed to the data analysis. K.L. contributed to the optimization  
757 of the IMC staining. O.L.R and V.R. supervised the optimization of the IMC staining. S.Z.  
758 performed the histological staining. A.P. acquired the patient tissue. Both A.P. and O.O.  
759 contributed intellectually. E.S. acquired the IMC data. T.D.M. and F.F. analysed the data.

760 J.L.G. supervised the study. V.R and J.L.G. contributed to the design of the study and wrote  
761 the manuscript.

## 762 References

- 763 1. Alvarez JI, Saint-Laurent O, Godschalk A, Terouz S, Briels C, Larouche S, Bourbonniere  
764 L, Laroche C, Prat A (2015) Focal disturbances in the blood-brain barrier are  
765 associated with formation of neuroinflammatory lesions. *Neurobiol Dis* 74:14-24.  
766 doi:10.1016/j.nbd.2014.09.016
- 767 2. Bandura DR, Baranov VI, Ornatsky OI, Antonov A, Kinach R, Lou X, Pavlov S, Vorobiev  
768 S, Dick JE, Tanner SD (2009) Mass cytometry: technique for real time single cell  
769 multitarget immunoassay based on inductively coupled plasma time-of-flight mass  
770 spectrometry. *Anal Chem* 81:6813-6822. doi:10.1021/ac901049w
- 771 3. Barnett MH, Prineas JW (2004) Relapsing and remitting multiple sclerosis: pathology of the  
772 newly forming lesion. *Ann Neurol* 55:458-468. doi:10.1002/ana.20016
- 773 4. Bendall SC, Simonds EF, Qiu P, Amir el AD, Krutzik PO, Finck R, Bruggner RV, Melamed  
774 R, Trejo A, Ornatsky OI, Balderas RS, Plevritis SK, Sachs K, Pe'er D, Tanner SD,  
775 Nolan GP (2011) Single-cell mass cytometry of differential immune and drug responses  
776 across a human hematopoietic continuum. *Science* 332:687-696.  
777 doi:10.1126/science.1198704
- 778 5. Bennett ML, Bennett FC, Liddel SA, Ajami B, Zamanian JL, Fernhoff NB, Mulinyawe  
779 SB, Bohlen CJ, Adil A, Tucker A, Weissman IL, Chang EF, Li G, Grant GA, Hayden  
780 Gephart MG, Barres BA (2016) New tools for studying microglia in the mouse and  
781 human CNS. *Proc Natl Acad Sci U S A* 113:E1738-1746.  
782 doi:10.1073/pnas.1525528113
- 783 6. Bodenmiller B, Zunder ER, Finck R, Chen TJ, Savig ES, Bruggner RV, Simonds EF,  
784 Bendall SC, Sachs K, Krutzik PO, Nolan GP (2012) Multiplexed mass cytometry  
785 profiling of cellular states perturbed by small-molecule regulators. *Nat Biotechnol*  
786 30:858-867. doi:10.1038/nbt.2317
- 787 7. Bruck W, Porada P, Poser S, Rieckmann P, Hanefeld F, Kretschmar HA, Lassmann H  
788 (1995) Monocyte/macrophage differentiation in early multiple sclerosis lesions. *Ann*  
789 *Neurol* 38:788-796. doi:10.1002/ana.410380514
- 790 8. Carpenter AE, Jones TR, Lamprecht MR, Clarke C, Kang IH, Friman O, Guertin DA, Chang  
791 JH, Lindquist RA, Moffat J, Golland P, Sabatini DM (2006) CellProfiler: image  
792 analysis software for identifying and quantifying cell phenotypes. *Genome Biol*  
793 7:R100. doi:10.1186/gb-2006-7-10-r100
- 794 9. Carvajal-Hausdorf DE, Patsenker J, Stanton KP, Villarroel-Espindola F, Esch A,  
795 Montgomery RR, Psyrrri A, Kalogeras KT, Kotoula V, Foutzilas G, Schalper KA,  
796 Kluger Y, Rimm DL (2019) Multiplexed (18-Plex) Measurement of Signaling Targets  
797 and Cytotoxic T Cells in Trastuzumab-Treated Patients using Imaging Mass  
798 Cytometry. *Clin Cancer Res*. doi:10.1158/1078-0432.CCR-18-2599
- 799 10. Chang Q, Ornatsky OI, Siddiqui I, Loboda A, Baranov VI, Hedley DW (2017) Imaging  
800 Mass Cytometry. *Cytometry A* 91:160-169. doi:10.1002/cyto.a.23053
- 801 11. Conde JR, Streit WJ (2006) Microglia in the aging brain. *J Neuropathol Exp Neurol* 65:199-  
802 203. doi:10.1097/01.jnen.0000202887.22082.63
- 803 12. Crabtree GR, Olson EN (2002) NFAT signaling: choreographing the social lives of cells.  
804 *Cell* 109 Suppl:S67-79
- 805 13. Ellingson BM, Zaw T, Cloughesy TF, Naeni KM, Lalezari S, Mong S, Lai A, Nghiemphu  
806 PL, Pope WB (2012) Comparison between intensity normalization techniques for  
807 dynamic susceptibility contrast (DSC)-MRI estimates of cerebral blood volume (CBV)  
808 in human gliomas. *J Magn Reson Imaging* 35:1472-1477. doi:10.1002/jmri.23600
- 809 14. Fischer MT, Sharma R, Lim JL, Haider L, Frischer JM, Drexhage J, Mahad D, Bradl M,  
810 van Horssen J, Lassmann H (2012) NADPH oxidase expression in active multiple

- 811 sclerosis lesions in relation to oxidative tissue damage and mitochondrial injury. *Brain*  
812 135:886-899. doi:10.1093/brain/aws012
- 813 15. Frischer JM, Bramow S, Dal-Bianco A, Lucchinetti CF, Rauschka H, Schmidbauer M,  
814 Laursen H, Sorensen PS, Lassmann H (2009) The relation between inflammation and  
815 neurodegeneration in multiple sclerosis brains. *Brain* 132:1175-1189.  
816 doi:10.1093/brain/awp070
- 817 16. Frischer JM, Weigand SD, Guo Y, Kale N, Parisi JE, Pirko I, Mandrekar J, Bramow S,  
818 Metz I, Bruck W, Lassmann H, Lucchinetti CF (2015) Clinical and pathological  
819 insights into the dynamic nature of the white matter multiple sclerosis plaque. *Ann*  
820 *Neurol* 78:710-721. doi:10.1002/ana.24497
- 821 17. Gay FW, Drye TJ, Dick GW, Esiri MM (1997) The application of multifactorial cluster  
822 analysis in the staging of plaques in early multiple sclerosis. Identification and  
823 characterization of the primary demyelinating lesion. *Brain* 120 ( Pt 8):1461-1483
- 824 18. Haider L, Simeonidou C, Steinberger G, Hametner S, Grigoriadis N, Deretzi G, Kovacs  
825 GG, Kutzelnigg A, Lassmann H, Frischer JM (2014) Multiple sclerosis deep grey  
826 matter: the relation between demyelination, neurodegeneration, inflammation and iron.  
827 *J Neurol Neurosurg Psychiatry* 85:1386-1395. doi:10.1136/jnnp-2014-307712
- 828 19. Han G, Spitzer MH, Bendall SC, Fantl WJ, Nolan GP (2018) Metal-isotope-tagged  
829 monoclonal antibodies for high-dimensional mass cytometry. *Nat Protoc* 13:2121-  
830 2148. doi:10.1038/s41596-018-0016-7
- 831 20. Hauser SL, Bar-Or A, Comi G, Giovannoni G, Hartung HP, Hemmer B, Lublin F,  
832 Montalban X, Rammohan KW, Selmaj K, Traboulsee A, Wolinsky JS, Arnold DL,  
833 Klingelschmitt G, Masterman D, Fontoura P, Belachew S, Chin P, Mairon N, Garren  
834 H, Kappos L, Opera I, Investigators OIC (2017) Ocrelizumab versus Interferon Beta-  
835 1a in Relapsing Multiple Sclerosis. *N Engl J Med* 376:221-234.  
836 doi:10.1056/NEJMoa1601277
- 837 21. Hauser SL, Waubant E, Arnold DL, Vollmer T, Antel J, Fox RJ, Bar-Or A, Panzara M,  
838 Sarkar N, Agarwal S, Langer-Gould A, Smith CH, Group HT (2008) B-cell depletion  
839 with rituximab in relapsing-remitting multiple sclerosis. *N Engl J Med* 358:676-688.  
840 doi:10.1056/NEJMoa0706383
- 841 22. Jones TR, Kang IH, Wheeler DB, Lindquist RA, Papallo A, Sabatini DM, Golland P,  
842 Carpenter AE (2008) CellProfiler Analyst: data exploration and analysis software for  
843 complex image-based screens. *BMC Bioinformatics* 9:482. doi:10.1186/1471-2105-9-  
844 482
- 845 23. Kebir H, Kreymborg K, Ifergan I, Dodelet-Devillers A, Cayrol R, Bernard M, Giuliani F,  
846 Arbour N, Becher B, Prat A (2007) Human TH17 lymphocytes promote blood-brain  
847 barrier disruption and central nervous system inflammation. *Nat Med* 13:1173-1175.  
848 doi:10.1038/nm1651
- 849 24. Koulrieris E, Panayiotidis P, Harding SJ, Kafasi N, Maltezas D, Bartzis V, Tzenou T, Dimou  
850 M, Georgiou G, Mirbahai L, Bradwell AR, Kyrtsionis MC (2012) Ratio of  
851 involved/uninvolved immunoglobulin quantification by Hevylite assay: clinical and  
852 prognostic impact in multiple myeloma. *Exp Hematol Oncol* 1:9. doi:10.1186/2162-  
853 3619-1-9
- 854 25. Kuhlmann T, Ludwin S, Prat A, Antel J, Bruck W, Lassmann H (2017) An updated  
855 histological classification system for multiple sclerosis lesions. *Acta Neuropathol*  
856 133:13-24. doi:10.1007/s00401-016-1653-y
- 857 26. Larochelle C, Metz I, Lecuyer MA, Terouz S, Roger M, Arbour N, Bruck W, Prat A (2017)  
858 Immunological and pathological characterization of fatal rebound MS activity  
859 following natalizumab withdrawal. *Mult Scler* 23:72-81.  
860 doi:10.1177/1352458516641775

- 861 27. Li H, Cuzner ML, Newcombe J (1996) Microglia-derived macrophages in early multiple  
862 sclerosis plaques. *Neuropathol Appl Neurobiol* 22:207-215
- 863 28. Lucchinetti C, Bruck W, Parisi J, Scheithauer B, Rodriguez M, Lassmann H (2000)  
864 Heterogeneity of multiple sclerosis lesions: implications for the pathogenesis of  
865 demyelination. *Ann Neurol* 47:707-717
- 866 29. Luchetti S, Fransen NL, van Eden CG, Ramaglia V, Mason M, Huitinga I (2018)  
867 Progressive multiple sclerosis patients show substantial lesion activity that correlates  
868 with clinical disease severity and sex: a retrospective autopsy cohort analysis. *Acta*  
869 *Neuropathol* 135:511-528. doi:10.1007/s00401-018-1818-y
- 870 30. Ma B, Yu J, Xie C, Sun L, Lin S, Ding J, Luo J, Cai H (2015) Toll-Like Receptors Promote  
871 Mitochondrial Translocation of Nuclear Transcription Factor Nuclear Factor of  
872 Activated T-Cells in Prolonged Microglial Activation. *J Neurosci* 35:10799-10814.  
873 doi:10.1523/JNEUROSCI.2455-14.2015
- 874 31. Machado-Santos J, Saji E, Troscher AR, Paunovic M, Liblau R, Gabriely G, Bien CG,  
875 Bauer J, Lassmann H (2018) The compartmentalized inflammatory response in the  
876 multiple sclerosis brain is composed of tissue-resident CD8+ T lymphocytes and B  
877 cells. *Brain* 141:2066-2082. doi:10.1093/brain/awy151
- 878 32. Marik C, Felts PA, Bauer J, Lassmann H, Smith KJ (2007) Lesion genesis in a subset of  
879 patients with multiple sclerosis: a role for innate immunity? *Brain* 130:2800-2815.  
880 doi:10.1093/brain/awm236
- 881 33. Perry VH, Nicoll JA, Holmes C (2010) Microglia in neurodegenerative disease. *Nat Rev*  
882 *Neurol* 6:193-201. doi:10.1038/nrneurol.2010.17
- 883 34. Podjaski C, Alvarez JI, Bourbonniere L, Larouche S, Terouz S, Bin JM, Lecuyer MA,  
884 Saint-Laurent O, Laroche C, Darlington PJ, Arbour N, Antel JP, Kennedy TE, Prat  
885 A (2015) Netrin 1 regulates blood-brain barrier function and neuroinflammation. *Brain*  
886 138:1598-1612. doi:10.1093/brain/awv092
- 887 35. Popescu BF, Frischer JM, Webb SM, Tham M, Adiele RC, Robinson CA, Fitz-Gibbon PD,  
888 Weigand SD, Metz I, Nehzati S, George GN, Pickering IJ, Bruck W, Hametner S,  
889 Lassmann H, Parisi JE, Yong G, Lucchinetti CF (2017) Pathogenic implications of  
890 distinct patterns of iron and zinc in chronic MS lesions. *Acta Neuropathol* 134:45-64.  
891 doi:10.1007/s00401-017-1696-8
- 892 36. Robinson AP, Harp CT, Noronha A, Miller SD (2014) The experimental autoimmune  
893 encephalomyelitis (EAE) model of MS: utility for understanding disease  
894 pathophysiology and treatment. *Handb Clin Neurol* 122:173-189. doi:10.1016/B978-0-  
895 444-52001-2.00008-X
- 896 37. Rojas OL, Probstel AK, Porfilio EA, Wang AA, Charabati M, Sun T, Lee DSW, Galicia  
897 G, Ramaglia V, Ward LA, Leung LYT, Najafi G, Khaleghi K, Garcillan B, Li A, Besla  
898 R, Naouar I, Cao EY, Chiaranunt P, Burrows K, Robinson HG, Allanach JR, Yam J,  
899 Luck H, Campbell DJ, Allman D, Brooks DG, Tomura M, Baumann R, Zamvil SS,  
900 Bar-Or A, Horwitz MS, Winer DA, Mortha A, Mackay F, Prat A, Osborne LC, Robbins  
901 C, Baranzini SE, Gommerman JL (2019) Recirculating Intestinal IgA-Producing Cells  
902 Regulate Neuroinflammation via IL-10. *Cell* 176:610-624 e618.  
903 doi:10.1016/j.cell.2018.11.035
- 904 38. Satoh J, Kino Y, Asahina N, Takitani M, Miyoshi J, Ishida T, Saito Y (2016) TMEM119  
905 marks a subset of microglia in the human brain. *Neuropathology* 36:39-49.  
906 doi:10.1111/neup.12235
- 907 39. Serafini B, Zandee S, Rosicarelli B, Scorsi E, Veroni C, Laroche C, D'Alfonso S, Prat  
908 A, Aloisi F (2018) Epstein-Barr virus-associated immune reconstitution inflammatory  
909 syndrome as possible cause of fulminant multiple sclerosis relapse after natalizumab  
910 interruption. *J Neuroimmunol* 319:9-12. doi:10.1016/j.jneuroim.2018.03.011

- 911 40. Storch MK, Piddlesden S, Haltia M, Iivanainen M, Morgan P, Lassmann H (1998) Multiple  
912 sclerosis: in situ evidence for antibody- and complement-mediated demyelination. *Ann*  
913 *Neurol* 43:465-471. doi:10.1002/ana.410430409
- 914 41. Sun D, Whitaker JN, Huang Z, Liu D, Coleclough C, Wekerle H, Raine CS (2001) Myelin  
915 antigen-specific CD8<sup>+</sup> T cells are encephalitogenic and produce severe disease in  
916 C57BL/6 mice. *J Immunol* 166:7579-7587
- 917 42. Vogel DY, Vereyken EJ, Glim JE, Heijnen PD, Moeton M, van der Valk P, Amor S,  
918 Teunissen CE, van Horssen J, Dijkstra CD (2013) Macrophages in inflammatory  
919 multiple sclerosis lesions have an intermediate activation status. *J Neuroinflammation*  
920 10:35. doi:10.1186/1742-2094-10-35
- 921 43. Wang Z, Zhu L, Nguyen THO, Wan Y, Sant S, Quinones-Parra SM, Crawford JC, Eltahla  
922 AA, Rizzetto S, Bull RA, Qiu C, Koutsakos M, Clemens EB, Loh L, Chen T, Liu L,  
923 Cao P, Ren Y, Kedzierski L, Kotsimbos T, McCaw JM, La Gruta NL, Turner SJ, Cheng  
924 AC, Luciani F, Zhang X, Doherty PC, Thomas PG, Xu J, Kedzierska K (2018) Clonally  
925 diverse CD38(+)HLA-DR(+)CD8(+) T cells persist during fatal H7N9 disease. *Nat*  
926 *Commun* 9:824. doi:10.1038/s41467-018-03243-7
- 927 44. Zrzavy T, Hametner S, Wimmer I, Butovsky O, Weiner HL, Lassmann H (2017) Loss of  
928 'homeostatic' microglia and patterns of their activation in active multiple sclerosis.  
929 *Brain* 140:1900-1913. doi:10.1093/brain/awx113

930 Figure 1

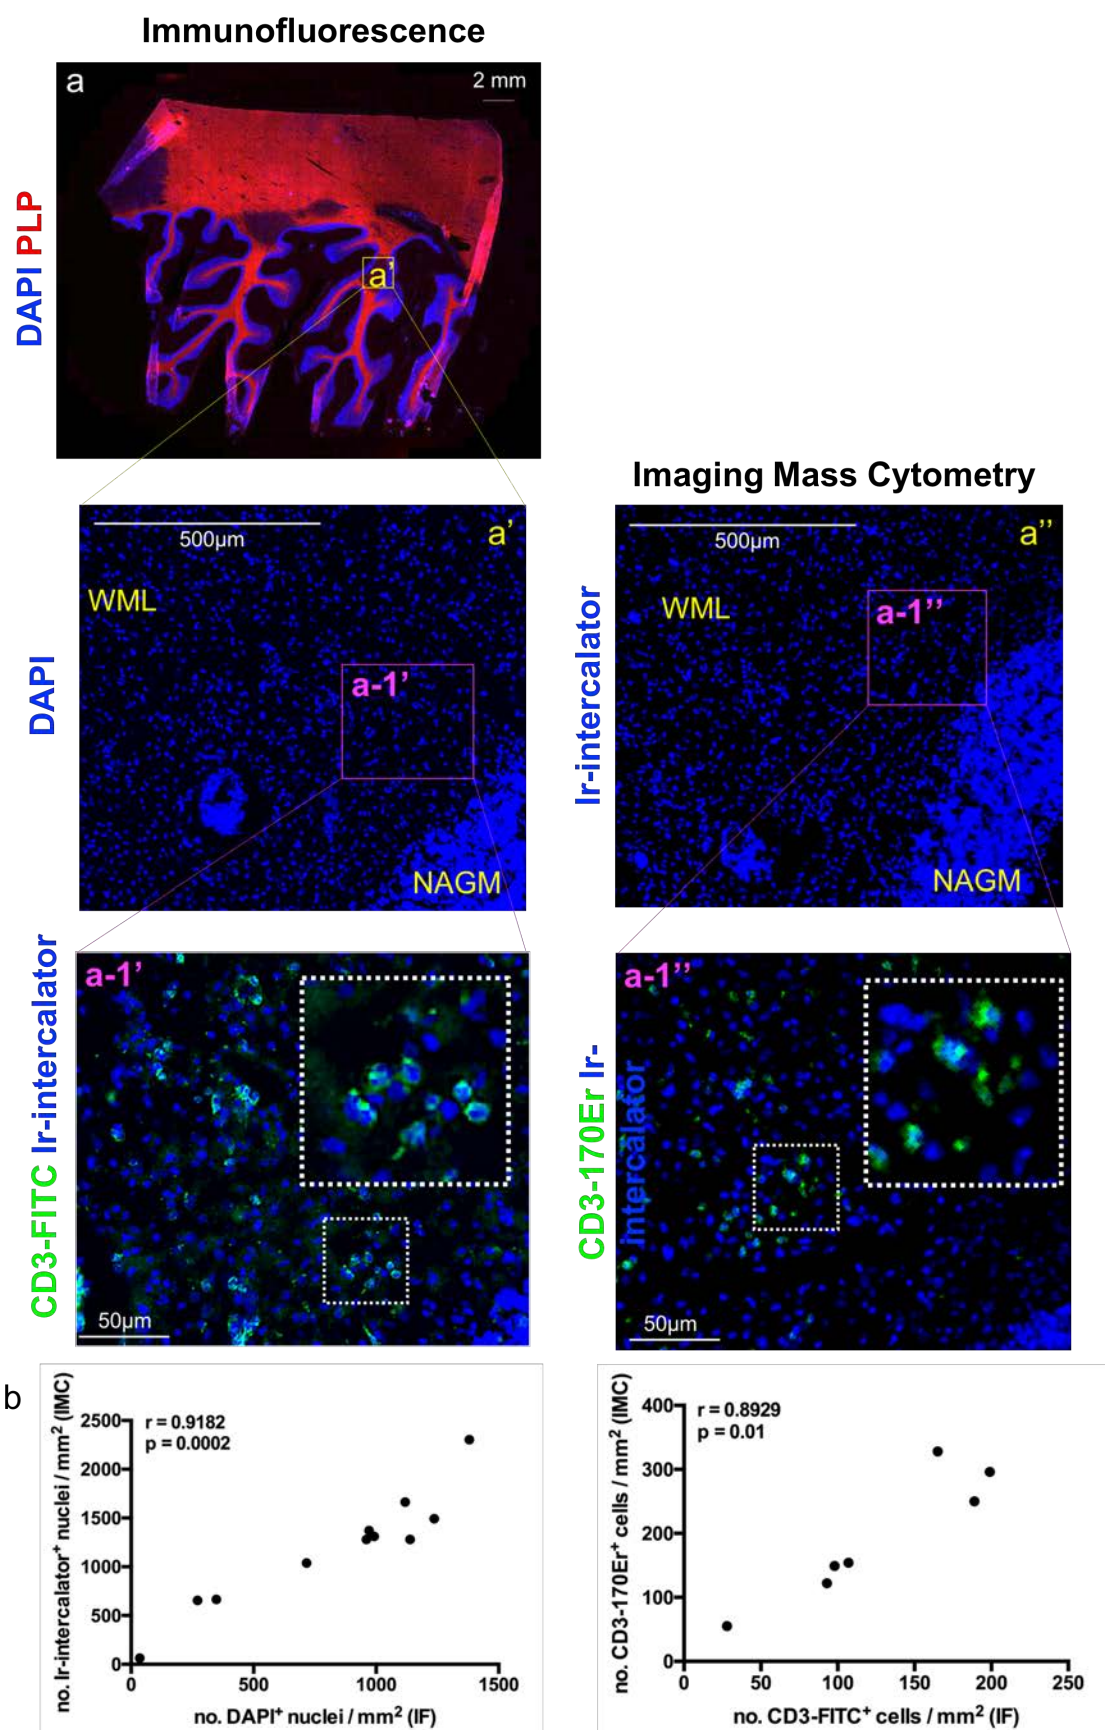

931 **Figure 2**

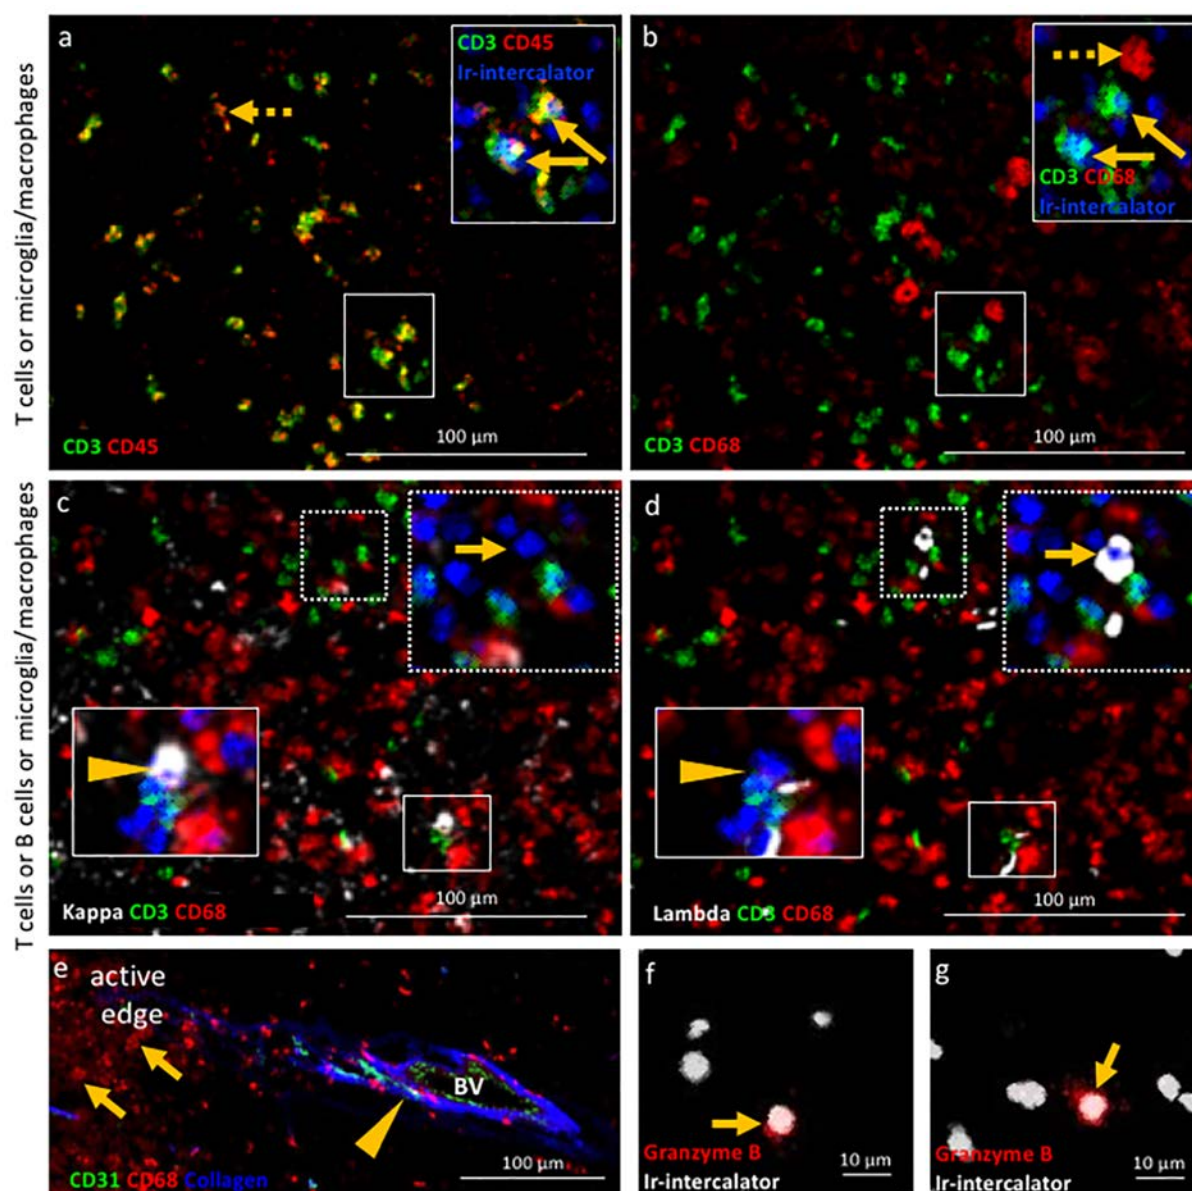



932 **Figure 3**

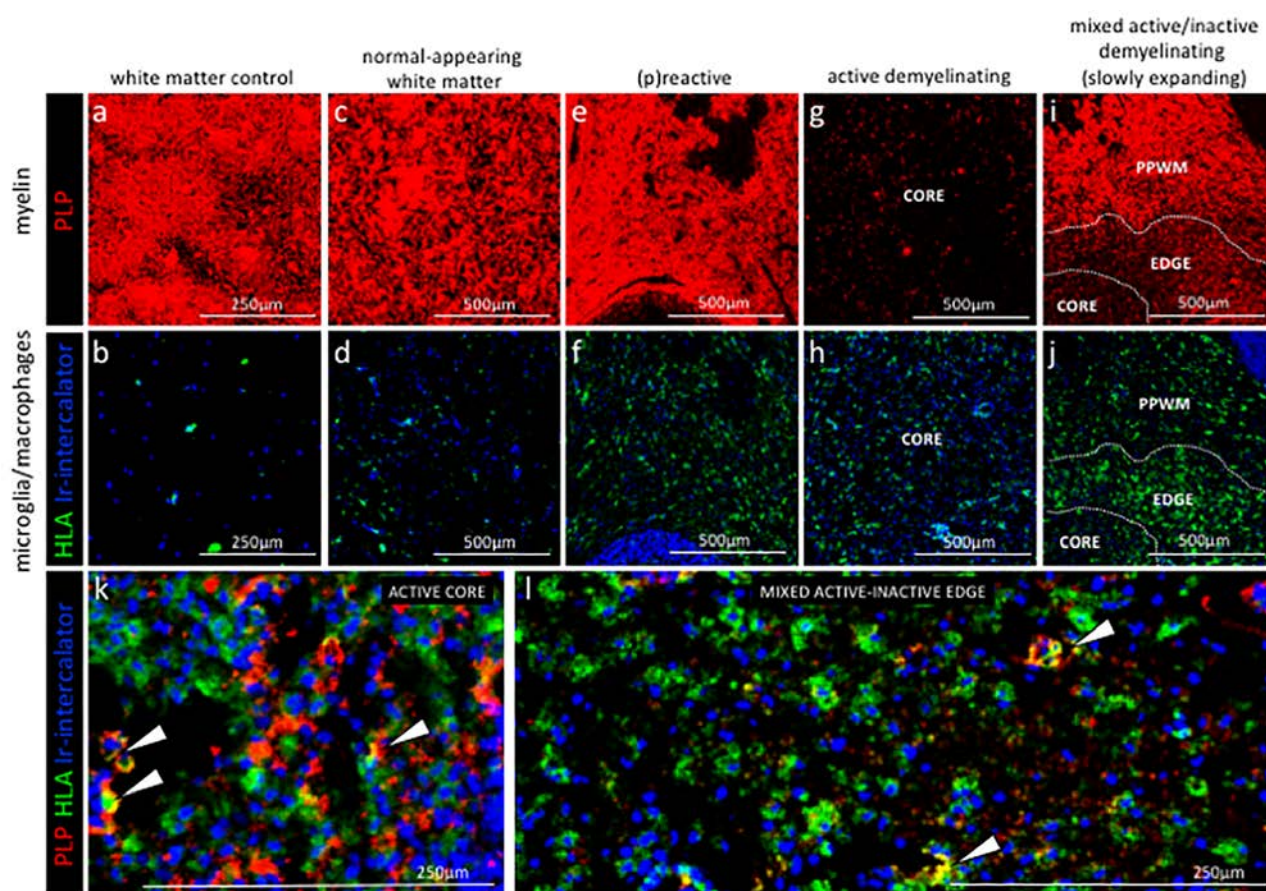

933 **Figure 4**

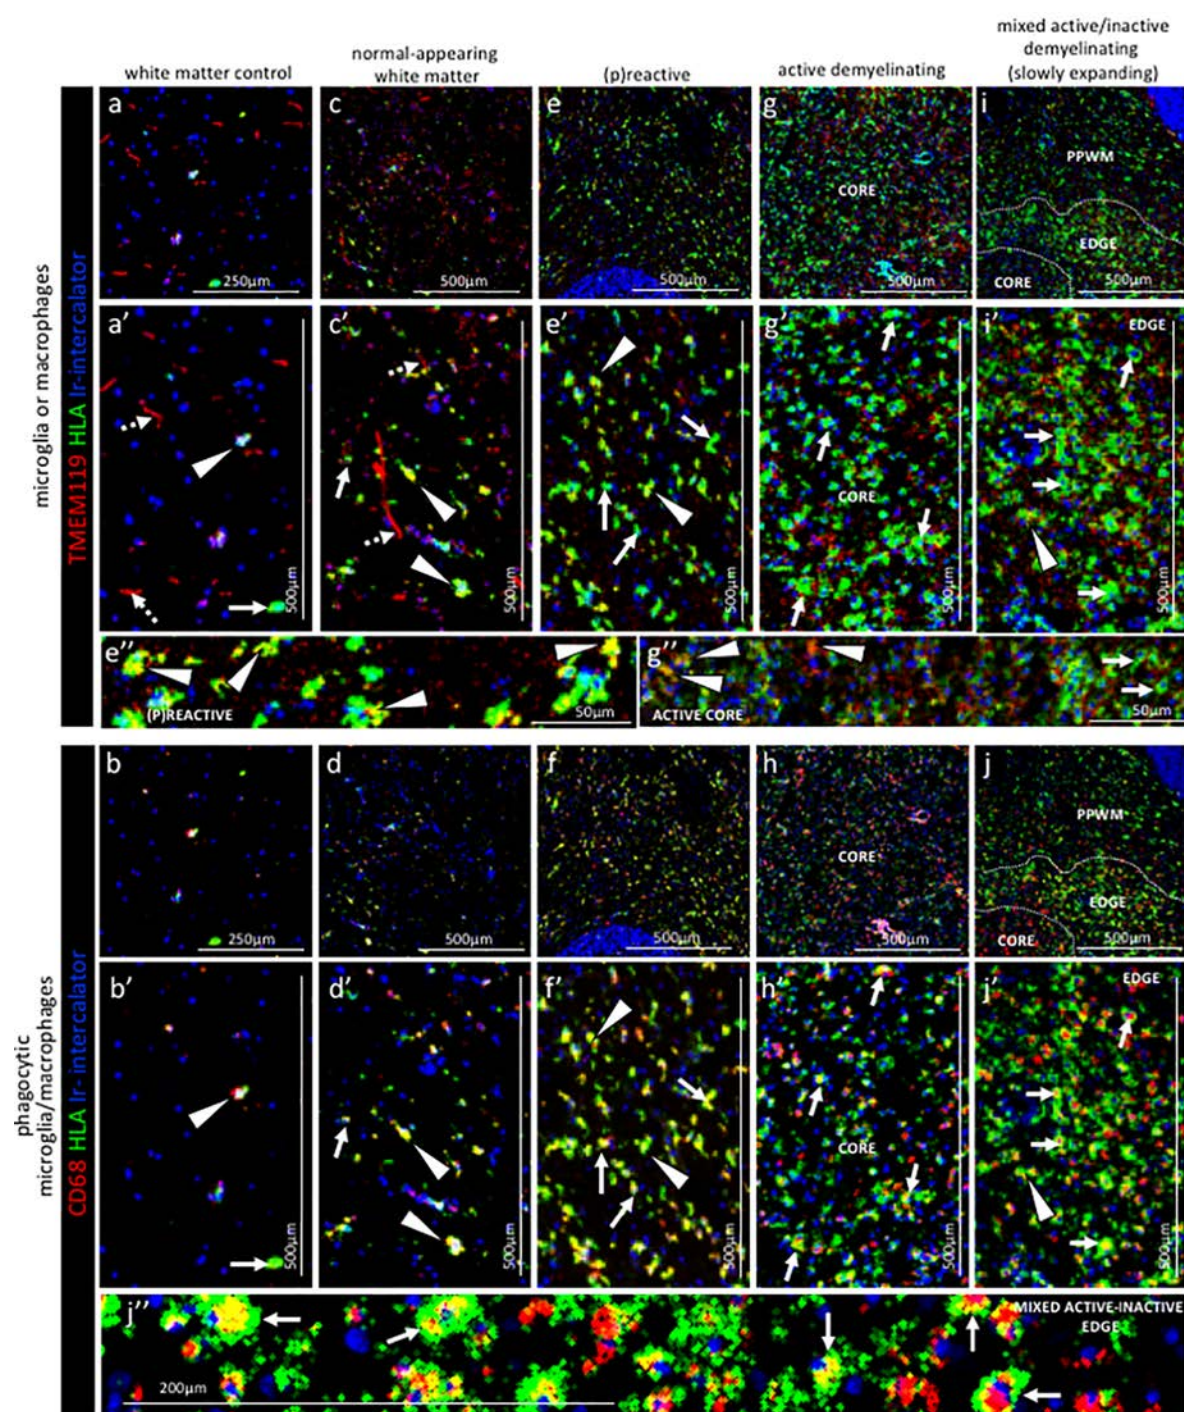

934 **Figure 5**

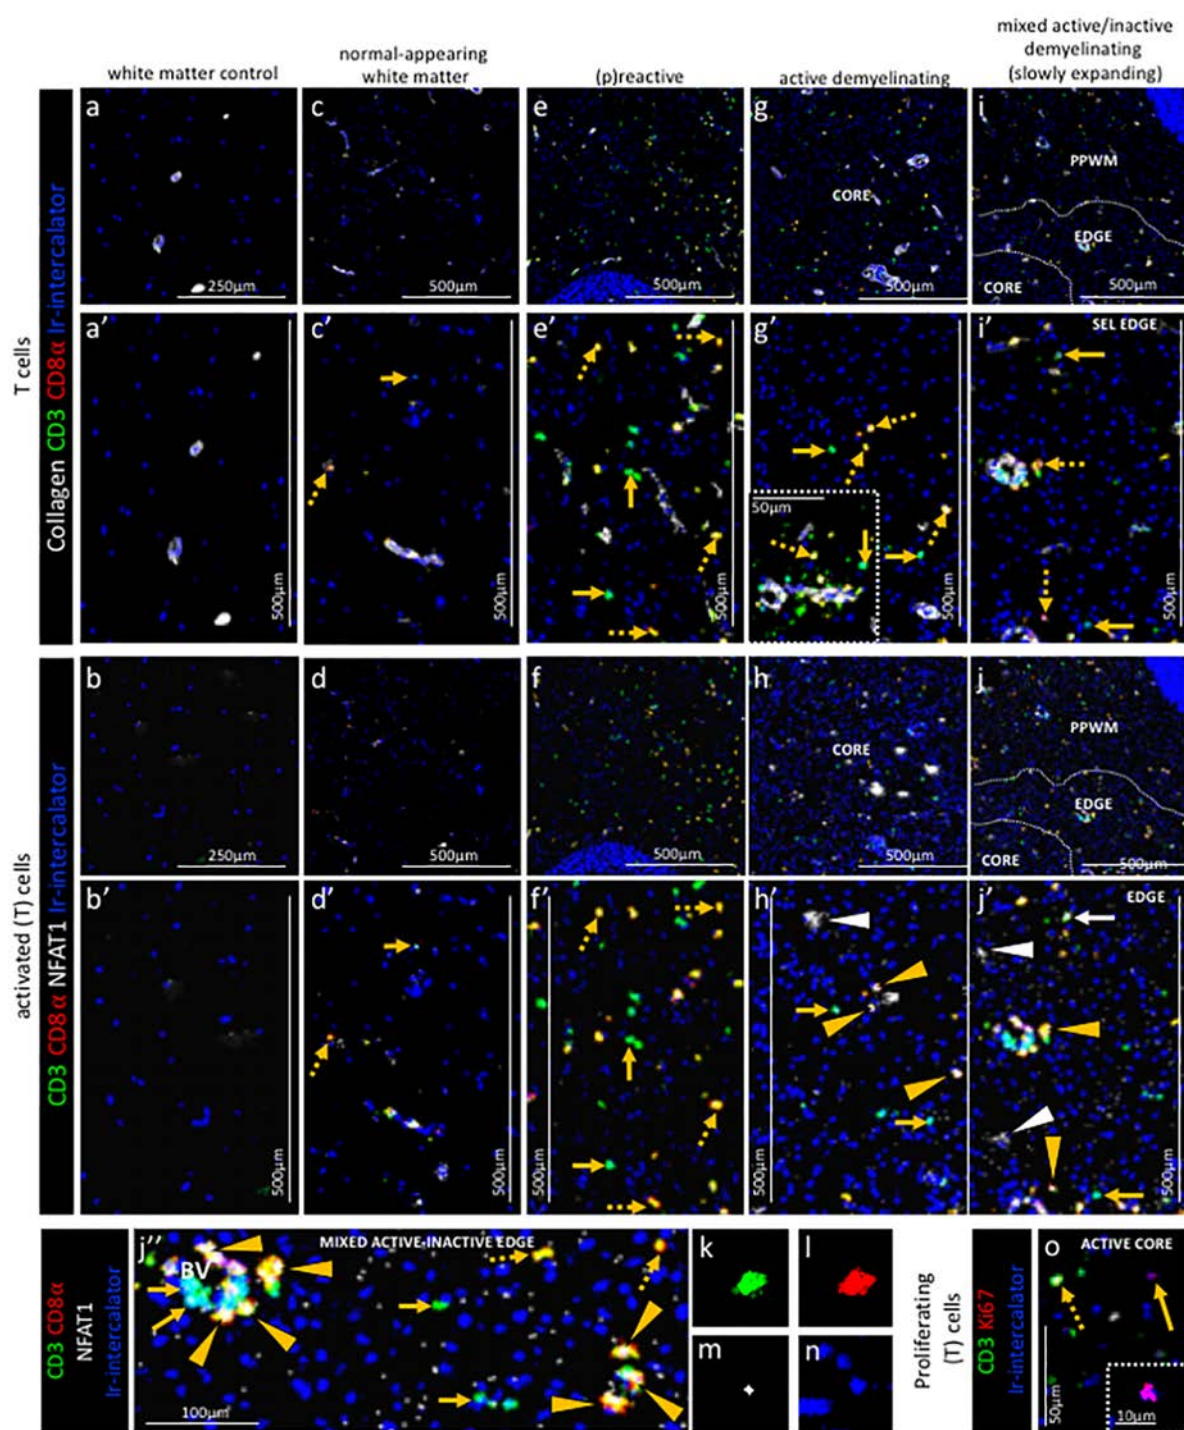

935 **Figure 6**

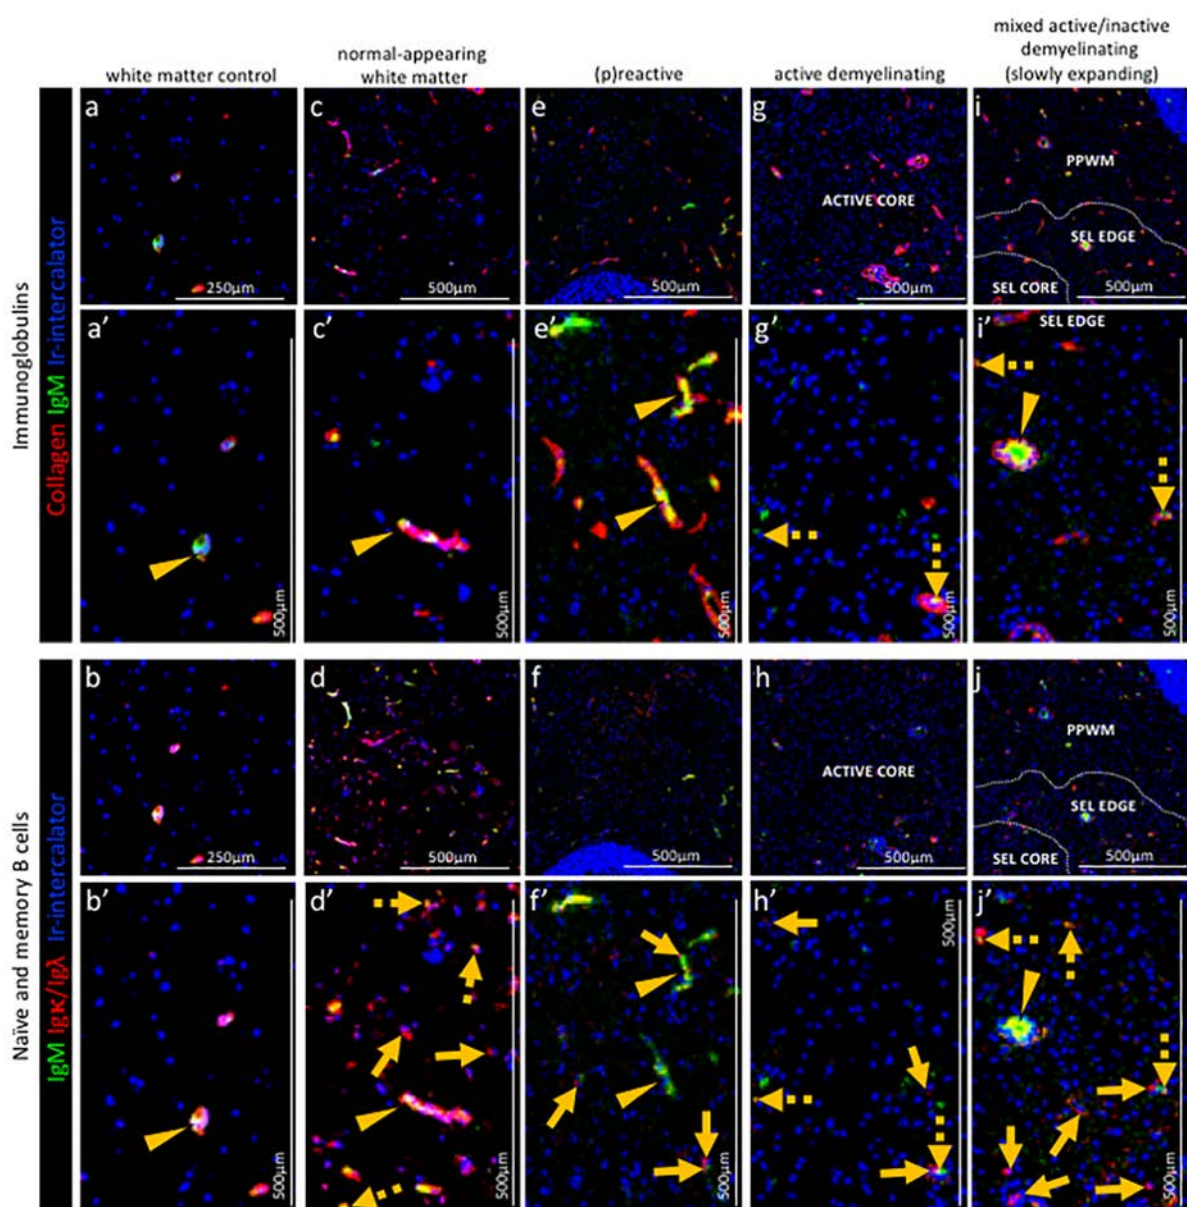

936 **Figure 7**

**a**

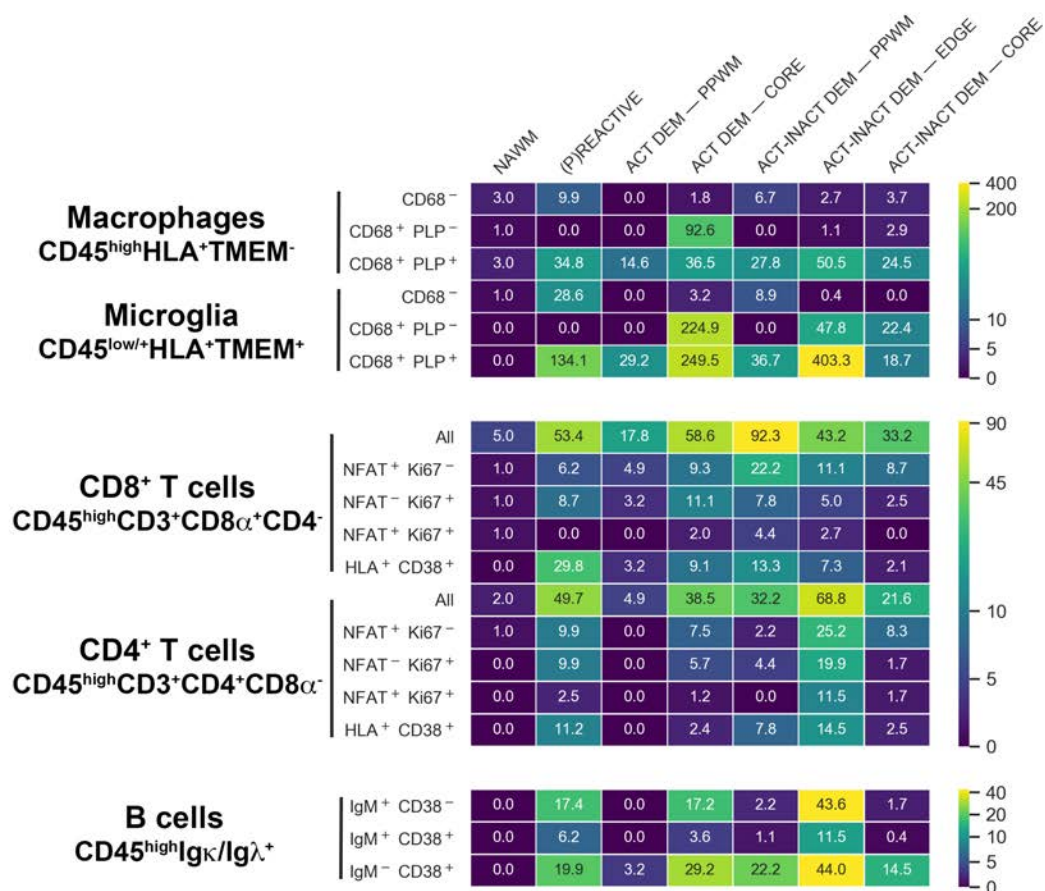

**b**

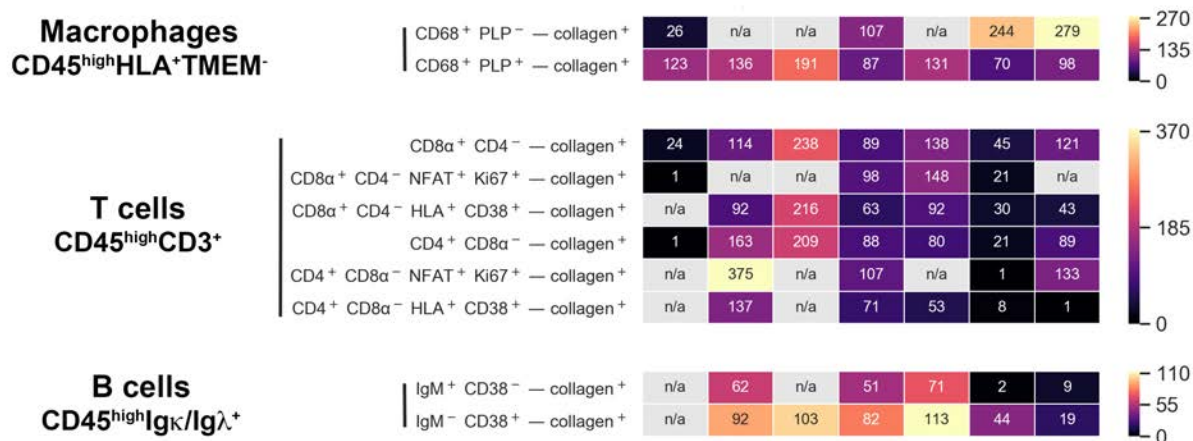

937

**Table 1. Lesion types and regions of interest**

| <b>Case</b>  | <b>Tissue Block<br/>(anatomical location)</b> | <b>Lesion Type</b>                     | <b>Region of interest</b> |
|--------------|-----------------------------------------------|----------------------------------------|---------------------------|
| C,<br>95-056 | A<br>(superior frontal gyrus)                 |                                        | WMC                       |
| MS,<br>AB129 | CL3a<br>(cerebellum)                          |                                        | NAWM                      |
|              |                                               | 2x Active demyelinating (pattern II)   | PPWM, center              |
|              |                                               | 3x Mixed active/inactive demyelinating | PPWM, edge, core          |
|              | CR4a<br>(cerebellum)                          |                                        | NAWM                      |
|              |                                               | (p)reactive                            |                           |
|              |                                               | 3x Active demyelinating (pattern II)   | center                    |
|              |                                               | 2x Mixed active/inactive demyelinating | edge, core                |

C, control; MS, multiple sclerosis; WMC, white matter of control; NAWM, normal-appearing white matter; PPWM, periplaque white matter.

938

939

**Table 2. Antibodies used for Imaging Mass Cytometry**

| <b>Antibody</b>                                    | <b>Target</b>                       | <b>Metal Tag</b> | <b>Antibody Clone</b>      | <b>Concentration (µg/ml)</b>          | <b>Source (Catalogue)</b>           |
|----------------------------------------------------|-------------------------------------|------------------|----------------------------|---------------------------------------|-------------------------------------|
| <b>Ir-Intercalator</b>                             | DNA                                 | Ir191<br>Ir193   |                            | 0.5                                   | Fluidigm (201192A)                  |
| <b>PLP (proteolipid protein)</b>                   | Myelin                              | 141Pr            | Plpc1                      | 20, 40 <sup>a</sup> , 10 <sup>b</sup> | Bio-Rad (MCA839G)                   |
| <b>CD38</b>                                        | Leukocytes                          | 167Er            | HIT2                       | 0.5                                   | Fluidigm (3167001B)                 |
| <b>CD45</b>                                        | Leukocytes/<br>Macrophages          | 154Sm            | HI30                       | 0.5                                   | Fluidigm (3154001B)                 |
| <b>CD68</b>                                        | Lysosomal Marker (phagocytic cells) | 159Tb            | KP1                        | 10                                    | Fluidigm (3159035D)                 |
| <b>HLA (human leukocyte antigen)</b>               | Microglia/<br>Macrophages           | 147Sm            | LN3                        | 5, 10 <sup>a</sup> , 5 <sup>b</sup>   | Abcam (Ab55152)                     |
| <b>TMEM119</b>                                     | Microglia                           | 155Gd            | Polyclonal                 | 10, 5 <sup>a</sup>                    | Sigma-Aldrich (HPA051870)           |
| <b>CD3</b>                                         | T Cells                             | 170Er            | UCHT1                      | 10                                    | Fluidigm (3170001B)                 |
| <b>CD4</b>                                         | CD4 <sup>+</sup> T Cells            | 176Yb            | SK3                        | 5, 25 <sup>a</sup>                    | BioLegend (344602)                  |
| <b>CD8α</b>                                        | CD8 <sup>+</sup> T cells            | 162Dy            | RPA-T8                     | 10                                    | Fluidigm (3162015B)                 |
| <b>Granzyme B</b>                                  | CD8 <sup>+</sup> T Cell Activation  | 171Yb            | GB11                       | 20, 50 <sup>a</sup>                   | ThermoFisher Scientific (MA1-80734) |
| <b>Ig Kappa</b>                                    | Immunoglobulin (light chain)        | 160Gd            | MHK-49                     | 0.33                                  | Fluidigm (3160006B)                 |
| <b>Ig Lambda</b>                                   | Immunoglobulin (light chain)        | 151Eu            | MHL-38                     | 0.33                                  | Fluidigm (3151004B)                 |
| <b>IgM</b>                                         | Immunoglobulin                      | 172Yb            | MHM-88                     | 2                                     | Fluidigm (3172004B)                 |
| <b>Collagen</b>                                    | Blood Vessels                       | 169Tm            | Polyclonal                 | 0.25                                  | Fluidigm (3169023D)                 |
| <b>CD31</b>                                        | Endothelial cells                   | 145Nd            | C31.3+<br>C31.7+<br>C31.10 | 10                                    | LSBio (LS-C390863)                  |
| <b>NFAT1 (Nuclear Factor of activated T cells)</b> | Cell activation                     | 143Nd            | D43B1                      | 20                                    | Fluidigm (3143023A)                 |
| <b>Ki67</b>                                        | Cell Proliferation                  | 168Er            | Ki-67                      | 10                                    | Fluidigm (3168001B)                 |

<sup>a</sup>, <sup>b</sup>concentration of the unlabeled antibody by immunofluorescence<sup>a</sup> or immunohistochemistry<sup>b</sup>

940

**Table 3. Antibody panels for the identification of functional cell types by IMC**

| Functional Cell Type                                 | Antibody Panel                                                                                                    |
|------------------------------------------------------|-------------------------------------------------------------------------------------------------------------------|
| <b>Macrophages and microglia</b>                     |                                                                                                                   |
| Macrophages                                          | CD45 <sup>high</sup> HLA <sup>+</sup> TMEM119 <sup>-</sup>                                                        |
| Activated macrophages                                | CD45 <sup>high</sup> HLA <sup>+</sup> TMEM119 <sup>-</sup> CD68 <sup>+</sup> PLP <sup>-</sup>                     |
| Demyelinating macrophages                            | CD45 <sup>high</sup> HLA <sup>+</sup> TMEM119 <sup>-</sup> CD68 <sup>+</sup> PLP <sup>+</sup>                     |
| Microglia                                            | CD45 <sup>low/+</sup> HLA <sup>+</sup> TMEM119 <sup>+</sup>                                                       |
| Activated microglia                                  | CD45 <sup>low/+</sup> HLA <sup>+</sup> TMEM119 <sup>+</sup> CD68 <sup>+</sup> PLP <sup>-</sup>                    |
| Demyelinating microglia                              | CD45 <sup>low/+</sup> HLA <sup>+</sup> TMEM119 <sup>+</sup> CD68 <sup>+</sup> PLP <sup>+</sup>                    |
|                                                      |                                                                                                                   |
| <b>T Cells</b>                                       |                                                                                                                   |
| CD8 <sup>+</sup> T cells                             | CD45 <sup>+</sup> CD3 <sup>+</sup> CD8 $\alpha$ <sup>+</sup> CD4 <sup>-</sup>                                     |
| Proliferating CD8 <sup>+</sup> T cells               | CD45 <sup>+</sup> CD8 $\alpha$ <sup>+</sup> CD3 <sup>+</sup> CD4 <sup>-</sup> Ki67 <sup>+</sup>                   |
| Activated CD8 <sup>+</sup> T cells                   | CD45 <sup>+</sup> CD3 <sup>+</sup> CD8 $\alpha$ <sup>+</sup> CD4 <sup>-</sup> NFAT <sup>+</sup>                   |
| Activated and proliferating CD8 <sup>+</sup> T cells | CD45 <sup>+</sup> CD3 <sup>+</sup> CD8 $\alpha$ <sup>+</sup> CD4 <sup>-</sup> NFAT <sup>+</sup> Ki67 <sup>+</sup> |
| “Chronically activated” CD8 <sup>+</sup> T cells     | CD45 <sup>+</sup> CD3 <sup>+</sup> CD8 $\alpha$ <sup>-</sup> CD8 <sup>+</sup> CD38 <sup>+</sup> HLA <sup>+</sup>  |
| CD4 <sup>+</sup> T cells                             | CD45 <sup>+</sup> CD3 <sup>+</sup> CD8 $\alpha$ <sup>-</sup> CD4 <sup>+</sup>                                     |
| Proliferating CD4 <sup>+</sup> T cells               | CD45 <sup>+</sup> CD8 $\alpha$ <sup>-</sup> CD3 <sup>+</sup> CD4 <sup>+</sup> Ki67 <sup>+</sup>                   |
| Activated CD4 <sup>+</sup> T cells                   | CD45 <sup>+</sup> CD3 <sup>+</sup> CD8 $\alpha$ <sup>-</sup> CD4 <sup>+</sup> NFAT <sup>+</sup>                   |
| Activated and proliferating CD4 <sup>+</sup> T cells | CD45 <sup>+</sup> CD3 <sup>+</sup> CD8 $\alpha$ <sup>-</sup> CD4 <sup>+</sup> NFAT <sup>+</sup> Ki67 <sup>+</sup> |
| “Chronically activated” CD4 <sup>+</sup> T cells     | CD45 <sup>+</sup> CD3 <sup>+</sup> CD8 $\alpha$ <sup>-</sup> CD4 <sup>+</sup> CD38 <sup>+</sup> HLA <sup>+</sup>  |
|                                                      |                                                                                                                   |
| <b>B Cells</b>                                       |                                                                                                                   |
| Naïve B Cells                                        | CD45 <sup>+</sup> Ig $\kappa$ /Ig $\lambda$ <sup>+</sup> IgM <sup>+</sup> CD38 <sup>-</sup>                       |
| IgM memory B cells                                   | CD45 <sup>+</sup> Ig $\kappa$ /Ig $\lambda$ <sup>+</sup> IgM <sup>+</sup> CD38 <sup>+</sup>                       |
| Switched memory B cells                              | CD45 <sup>+</sup> Ig $\kappa$ /Ig $\lambda$ <sup>+</sup> IgM <sup>-</sup> CD38 <sup>+</sup>                       |

941



942 **Figure 1 Comparing IMC to IF in MS lesions.** Two serial sections were assessed: one used  
943 for immunofluorescence (IF, **a and a'**) and one dedicated to Imaging Mass Cytometry (IMC,  
944 **a''**). The region of interest (**a'**) was guided by the immunofluorescence staining with anti-  
945 PLP (proteolipid protein, shown in red to visualize myelin), and DAPI (shown in blue to  
946 visualize nuclei) (**a**) for the identification of lesion location and type (see **Figure 1 – Figure**  
947 **Supplement 1**). The entire region of interest on a serial section was subjected to IMC,  
948 according to the work flow shown in **Figure 1 – Figure Supplement 2**. Staining with  
949 Iridium (Ir)-intercalator is shown in blue to visualize DNA in nuclei. A blow up area  
950 (referred to as **a-1'** for IF and **a-1''** for IMC) of the region of interest within an active lesion,  
951 was also stained with fluorochrome conjugated anti-CD3 (**a-1'**) or metal conjugated anti-CD3  
952 (**a-1''**), both depicted in green. WML, white matter lesion; NAGM, normal-appearing grey  
953 matter. **(b)** Spearman correlation coefficient, showing a significant positive correlation  
954 between the number of nuclei identified with DAPI by IF and the number of nuclei identified  
955 with Ir-intercalator by IMC (n=11, coefficient,  $r=0.9182$ ,  $p=0.0002$ ). **(c)** Spearman  
956 correlation coefficient, showing a significant positive correlation between the number of  
957 CD3<sup>+</sup> T cells identified with fluorochrome-conjugated antibody by IF and the number of  
958 CD3<sup>+</sup> T cells identified with metal-conjugated antibody by IMC (n=7, coefficient,  $r=0.8929$ ,  
959  $p=0.01$ ).

960

961 **Figure 2 Validation of IMC specificity in MS lesions.** **(a)** Overlay of CD3 (green) and CD45  
962 (red) identifies CD3<sup>+</sup>CD45<sup>+</sup> T cells (solid arrows) and CD3<sup>-</sup>CD45<sup>+</sup> leukocytes other than T  
963 cells (dotted arrow). **(b)** Overlay of CD3 (green) and CD68 (red) identifies CD3<sup>+</sup>CD68<sup>-</sup> T cells  
964 (solid arrows) and CD3<sup>-</sup>CD68<sup>+</sup> microglia /macrophages (dotted arrow). Note that the solid  
965 arrows in a and b indicates the same CD3<sup>+</sup>CD45<sup>+</sup>CD68<sup>-</sup> T cells. **(c)** Overlay of  $\kappa$  (white), CD3  
966 (green) and CD68 (red) and **(d)** overlay of  $\lambda$  (white), CD3 (green) and CD68 (red) identify

967  $\kappa^+CD3^-CD68^-$  B cells (arrow head in **c**) that are  $\lambda^-CD3^-CD68^-$  (arrow head in **d**) and  $\kappa^-CD3^-$   
968  $CD68^-$  B cells (arrow in **c**) that are  $\lambda^+CD3^-CD68^-$  (arrow in **d**), as expected based on the allelic  
969 exclusion of  $\kappa$  and  $\lambda$ . (**e**) Overlay of CD31 (green), CD68 (red) and Collagen (blue) identifies  
970  $CD31^+Collagen^+CD68^-$  endothelial cells (arrow head) and  $CD31^-Collagen^-$   
971  $CD68^+$  microglia/macrophages (arrows). (**f, g**) Granzyme B<sup>+</sup> cells (arrows). Images in **a** and  
972 **b** as well as images in **c** and **d** are from the same areas of an active demyelinating lesion. Image  
973 in **e** are from the edge of an active demyelinating lesion. Images in **f** and **g** are from the center  
974 of an active demyelinating lesion.

975

976 **Figure 3 Staging of MS lesions by IMC.** Representative mass cytometry images of white  
977 matter areas of healthy control (**a, f**), MS normal-appearing white matter (block no. CR4A)  
978 (**b, g**), MS (p)reactive lesion (block no. CR4A) (**c, h**), MS active demyelinating lesion (block  
979 no. CR4A) (**d-i**) and an MS slowly expanding lesion (block no. CL3A) (**e-j**). For each region  
980 of interest, we show the same area simultaneously labeled with markers of myelin  
981 (proteolipid protein, PLP), antigen presentation (human leukocyte antigen, HLA) to detect  
982 microglia/macrophages and DNA (intercalator). Images of PLP (red) (**a-e**) and overlay of  
983 HLA (green) and intercalator (blue) (**f-i**) show the lesion activity in staged MS lesions  
984 compared to control white matter and normal-appearing white matter. (**k, l**) Overlay of PLP,  
985 HLA and intercalator show microglia/macrophages containing PLP<sup>+</sup> myelin protein in the  
986 core of an active lesion (**k**) and in the edge of a slowly expanding lesion (**l**), indicative of  
987 demyelinating activity. PPWM, periplaque white matter; BV, blood vessel.

988

989 **Figure 4 Pattern of microglia or macrophage activity in different stages of MS lesions by**  
990 **IMC.** Representative mass cytometry images of control white matter (**a, a', b, b'**), normal-  
991 appearing white matter (block no. CR4A) (**c, c', d, d'**), (p)reactive lesion (block no. CR4A) (**e,**

992 **e', f, f')**, active demyelinating lesion (block no. CR4A) (**g, g', h, h'**) and slowly expanding  
993 lesion (block no. CL3A) (**i, i', j, j'**). For each region of interest, we show the same area  
994 simultaneously labeled with markers of antigen presentation (human leukocyte antigen, HLA)  
995 to detect microglia and/or macrophages, TMEM119 to detect microglia, lysosomes (CD68) to  
996 detect phagocytic cells and DNA (Ir-intercalator). (**a, a'- i, i'**) Overlay of TMEM119 (red),  
997 HLA (green) and Ir-intercalator (blue) identifies TMEM119<sup>+</sup>HLA<sup>-</sup> resting microglia with thin  
998 elongated processes (dotted arrows in **a' and c'**) and TMEM119<sup>+</sup>HLA<sup>+</sup> activated microglia  
999 (arrows head in **a',c', e', i' and e''**) or TMEM119<sup>-</sup>HLA<sup>+</sup> activated macrophages (solid arrows  
1000 in **a', c', e', g', i' and g''**). (**b, b'-j, j''**) Overlay of CD68 (red), HLA (green) and intercalator  
1001 (blue) identifies HLA<sup>+</sup>CD68<sup>+</sup> phagocytic microglia/macrophages. PPWM, periplaque white  
1002 matter; BV, blood vessel.

1003 **Figure 5 Pattern of T cell subpopulations in different stages of MS lesions by IMC.**

1004 Representative mass cytometry images of white matter of control (**a, a', b, b'**), normal-  
1005 appearing white matter (block no. CR4A) (**c, c', d, d'**), (p)reactive lesion (block no. CR4A) (**e,**  
1006 **e', f, f')**, active demyelinating lesion (block no. CR4A) (**g, g', h, h', o**) and slowly expanding  
1007 lesion (block no. CL3A) (**i, i', j-n**). For each region of interest, we show the same area  
1008 simultaneously labeled with anti-collagen antibodies to visualize blood vessels, all T cells  
1009 (CD3), CD8 $\alpha$  T cells, cell proliferation (Ki67) and DNA (Ir-intercalator). (**a, a'- i, i'**) Overlay  
1010 of collagen (white), CD3 (green), CD8 $\alpha$  (red) and Ir-intercalator (blue) identifies CD3<sup>+</sup>CD8 $\alpha$ <sup>+</sup>  
1011 T cells (dotted arrows in **c', e', g' and i'**), CD3<sup>+</sup>CD8 $\alpha$ <sup>-</sup> (therefore by exclusion putative CD4<sup>+</sup>)  
1012 T cells (solid arrows in **c', e', g' and i'**) and collagen<sup>+</sup> blood vessels. (**b-b'-j, j''**) Overlay of  
1013 CD3 (in green), CD8 $\alpha$  (red), NFAT1 (in white) and Ir-intercalator (in blue) identifies  
1014 CD3<sup>+</sup>CD8 $\alpha$ <sup>+</sup>NFAT1<sup>+</sup> T cells (yellow arrow head in **h', j' and j''**) and CD3<sup>+</sup>CD8 $\alpha$ <sup>-</sup>NFAT1<sup>+</sup>  
1015 (putative CD4<sup>+</sup>) T cells (white solid arrow in **j'**). CD3<sup>-</sup>CD8 $\alpha$ <sup>-</sup>NFAT1<sup>+</sup> cells are also detected

1016 (white arrow head in **h'** and **j'**). (**o**) Overlay of CD3 (in green), Ki67 (red) and Ir-intercalator  
1017 (in blue) identifies CD3<sup>+</sup>Ki67<sup>+</sup> proliferating Tcells (dotted arrow) and CD3<sup>-</sup>Ki67<sup>+</sup> proliferating  
1018 cells other than T cells (solid arrows and inset). PPWM, periplaque white matter.

1019

1020 **Figure 6 Pattern of immunoglobulins and B cell subpopulations in different stages of MS**  
1021 **lesions by IMC.** Representative mass cytometry images of white matter of control (**a, a', b,**  
1022 **b'**), normal-appearing white matter (block no. CR4A) (**c, c', d, d'**), a (p)reactive lesion (block  
1023 no. CR4A) (**e, e', f, f'**), an active demyelinating lesion (block no. CR4A) (**g, g', h, h', o**) and a  
1024 slowly expanding lesion (block no. CL3A) (**i, i', j-n**). For each region of interest, we show the  
1025 same area simultaneously labeled with markers of endothelial cells (collagen) to detect blood  
1026 vessels, immunoglobulin M (IgM), the  $\kappa$  or  $\lambda$  light chain of immunoglobulins (Ig $\kappa$ /Ig $\lambda$ ) to  
1027 detect B cells and DNA (Ir-intercalator). (**a, a-i, i'**) Overlay of collagen (red), IgM (green) and  
1028 Ir-intercalator (blue) identifies cellular (intercalator-associated, dotted arrows in **g'** and **i'**) and  
1029 non-cellular (free immunoglobulin, arrows head in **a', c', e', i'**) IgM in the parenchyma or  
1030 within collagen<sup>+</sup> blood vessels. (**b, b'-j, j'**) Overlay of IgM (green), Ig $\kappa$ /Ig $\lambda$  (red) and Ir-  
1031 intercalator (blue) identifies Ig $\kappa$ /Ig $\lambda$ <sup>+</sup>IgM<sup>+</sup> naïve and IgM memory B cells (dotted arrow in **d',**  
1032 **h' and j'**) and Ig $\kappa$ /Ig $\lambda$ <sup>+</sup>IgM<sup>-</sup> class switch B cells (solid arrows in **d', f', h' and j'**).

1033

1034 **Figure 7 Density of immune cell subsets in different stages of MS lesions and their**  
1035 **distance from blood vessels by IMC.** (**a**) Cell counts are provided as number of cells per mm<sup>2</sup>  
1036 of region of interest. The category of cells is defined according to the expression of cell-specific  
1037 and functional markers as indicated and also described in **Table 3**. (**b**) Distance between  
1038 defined categories of cells and blood vessels (collagen<sup>+</sup>) are provided in  $\mu$ m. NAWM, normal-  
1039 appearing white matter; PPWM, periplaque white matter; Act dem, active demyelinating; act  
1040 inact dem, active-inactive demyelinating. The single-cell segmentation strategy is shown in

1041 **Figure 7 – Figure Supplement 1.** The Positive and negative “gates” used to identify each cell  
1042 subset were established based on the quadrants laid out in **Figure 7 – Figure Supplement 2.**  
1043 Please see the section “Gating strategy for quantitative analysis of T cell, B cell, macrophage  
1044 and microglial cell subsets” in the materials and methods. The gating strategy used for the  
1045 generation of heat maps is laid out in **Figure 7 – Figure Supplement 3.** Source files used for  
1046 the quantitative analysis are provided in **Figure 7 – Source data 1.**  
1047

1048 **Figure Supplements**  
**Figure 1 – Figure Supplement 1**

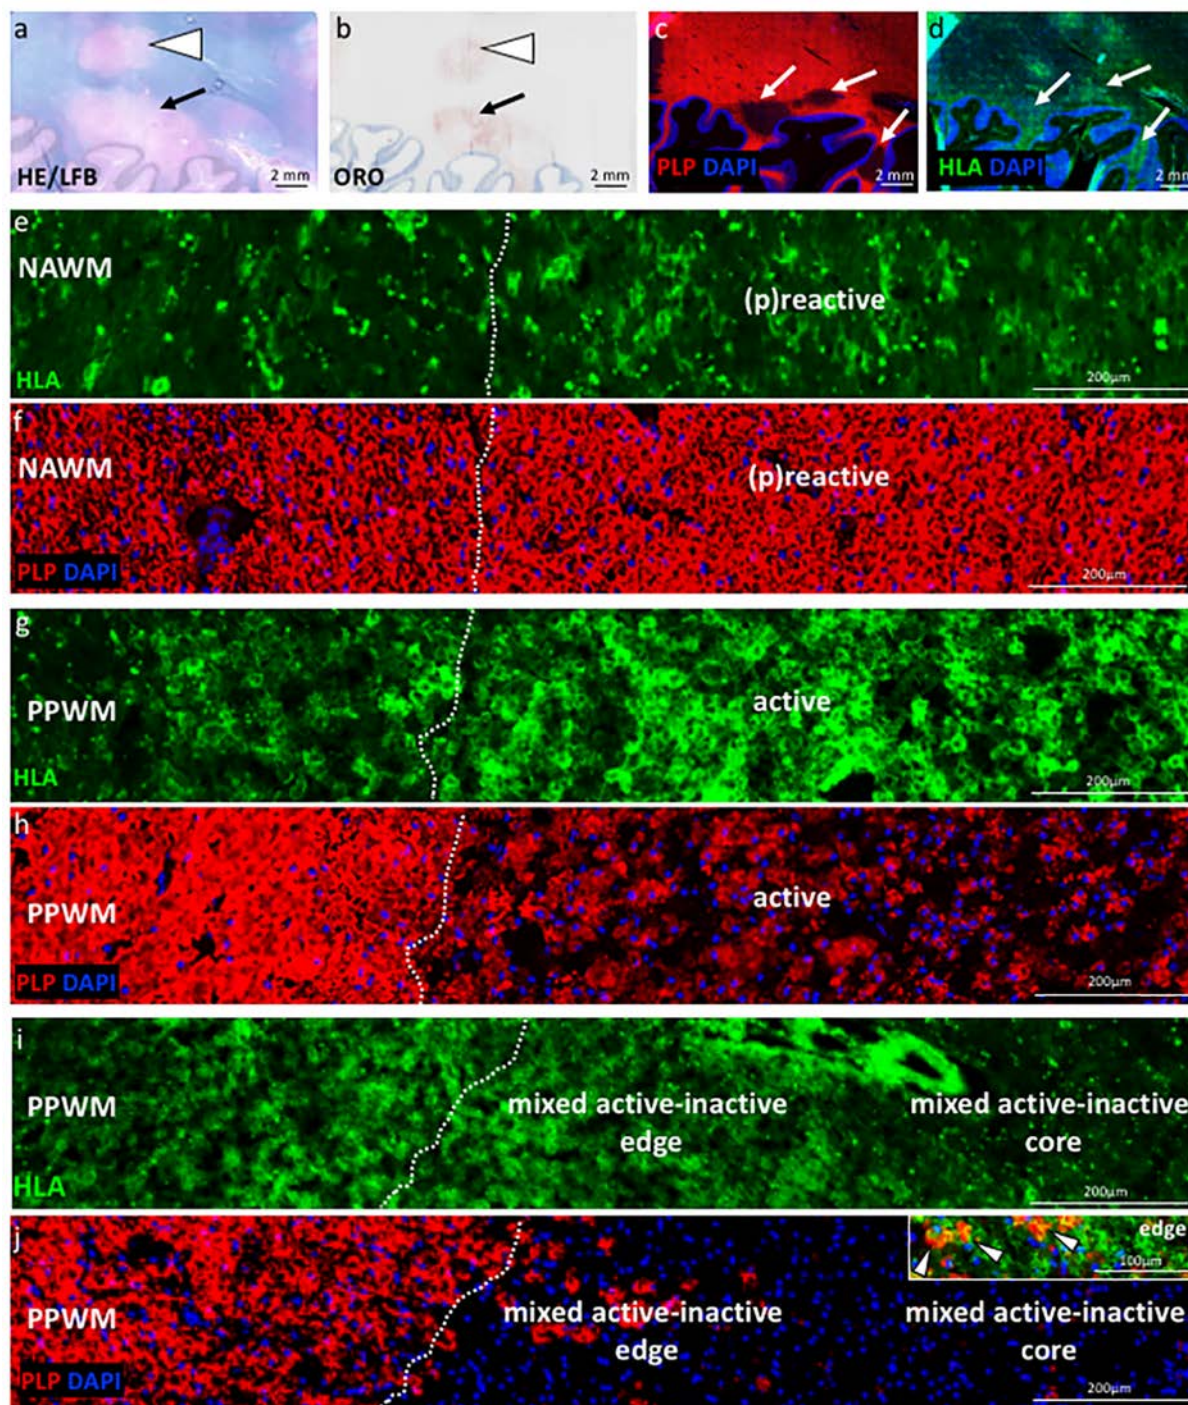

Figure 1 – Figure Supplement 2

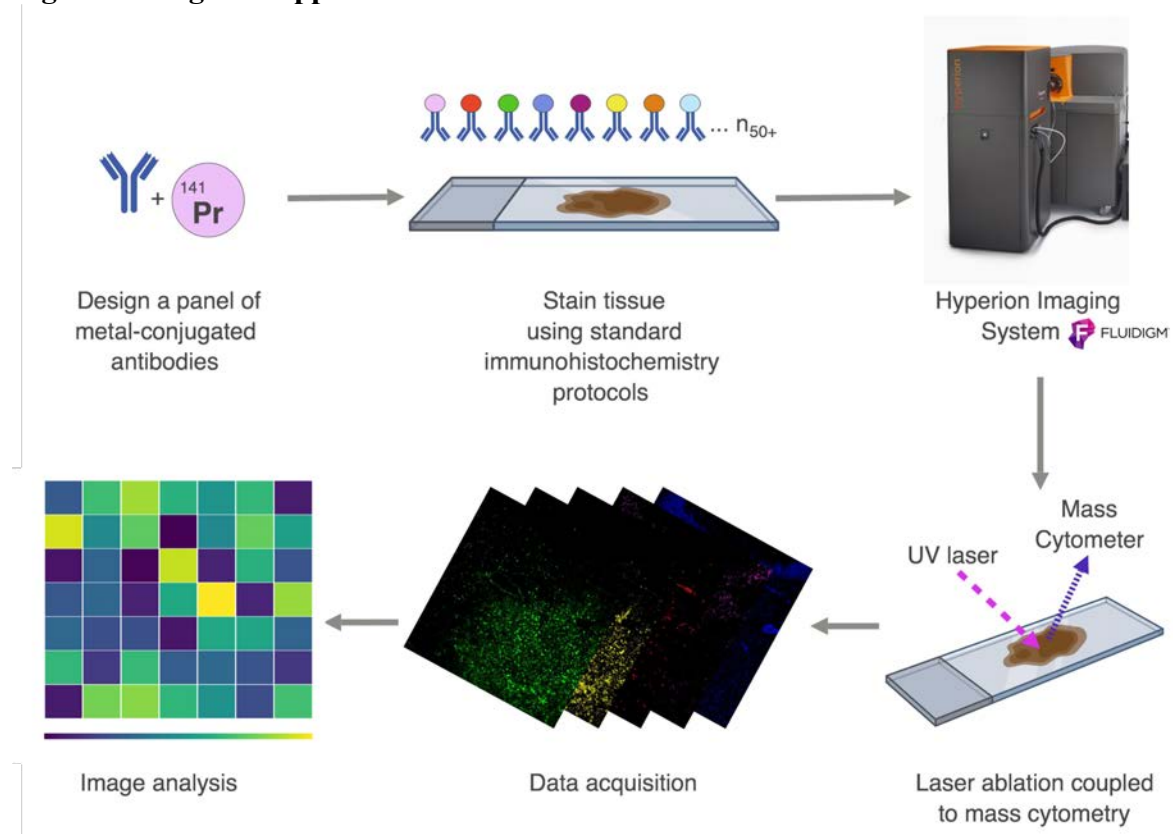

1049 **Figure 1 – Figure Supplement 3**

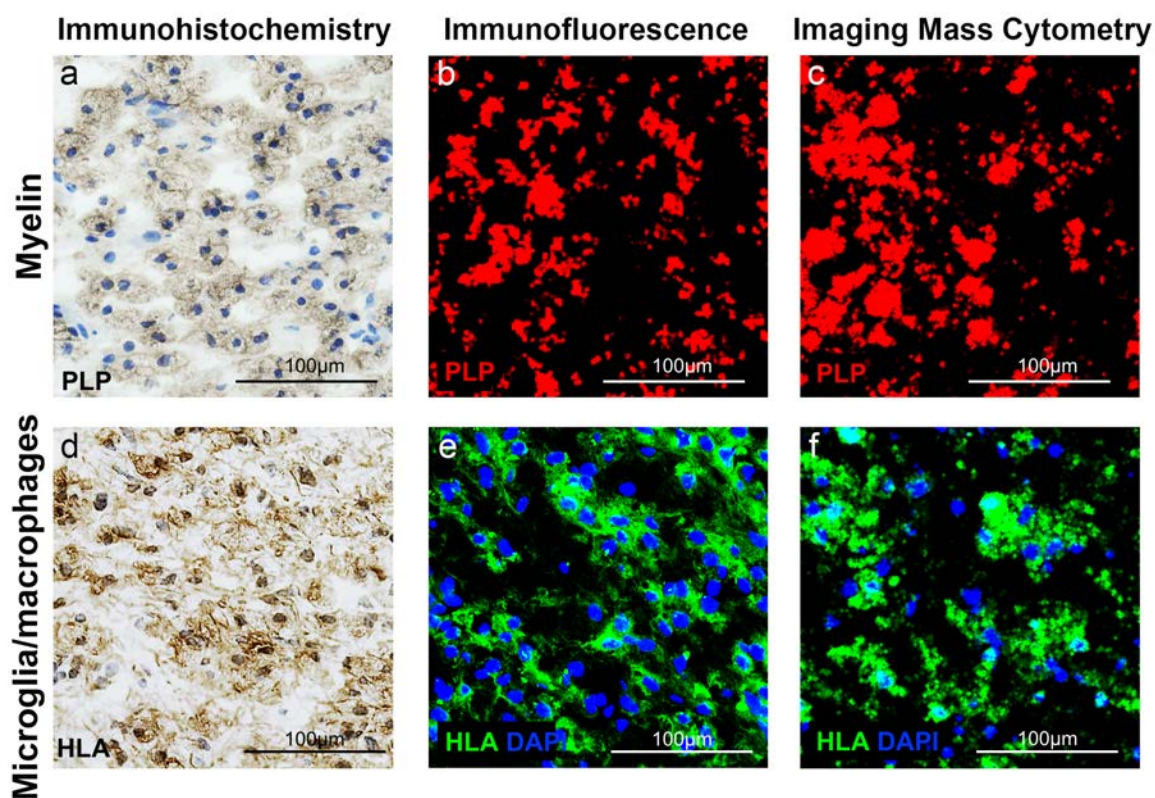

1050  
1051



1052 **Figure 7 – Figure Supplement 1**

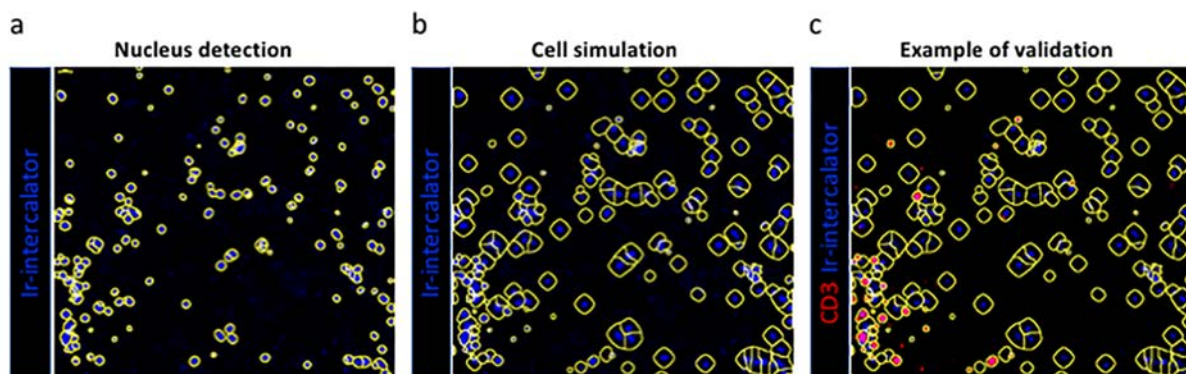

1053

1054 **Figure 7 – Figure Supplement 2**

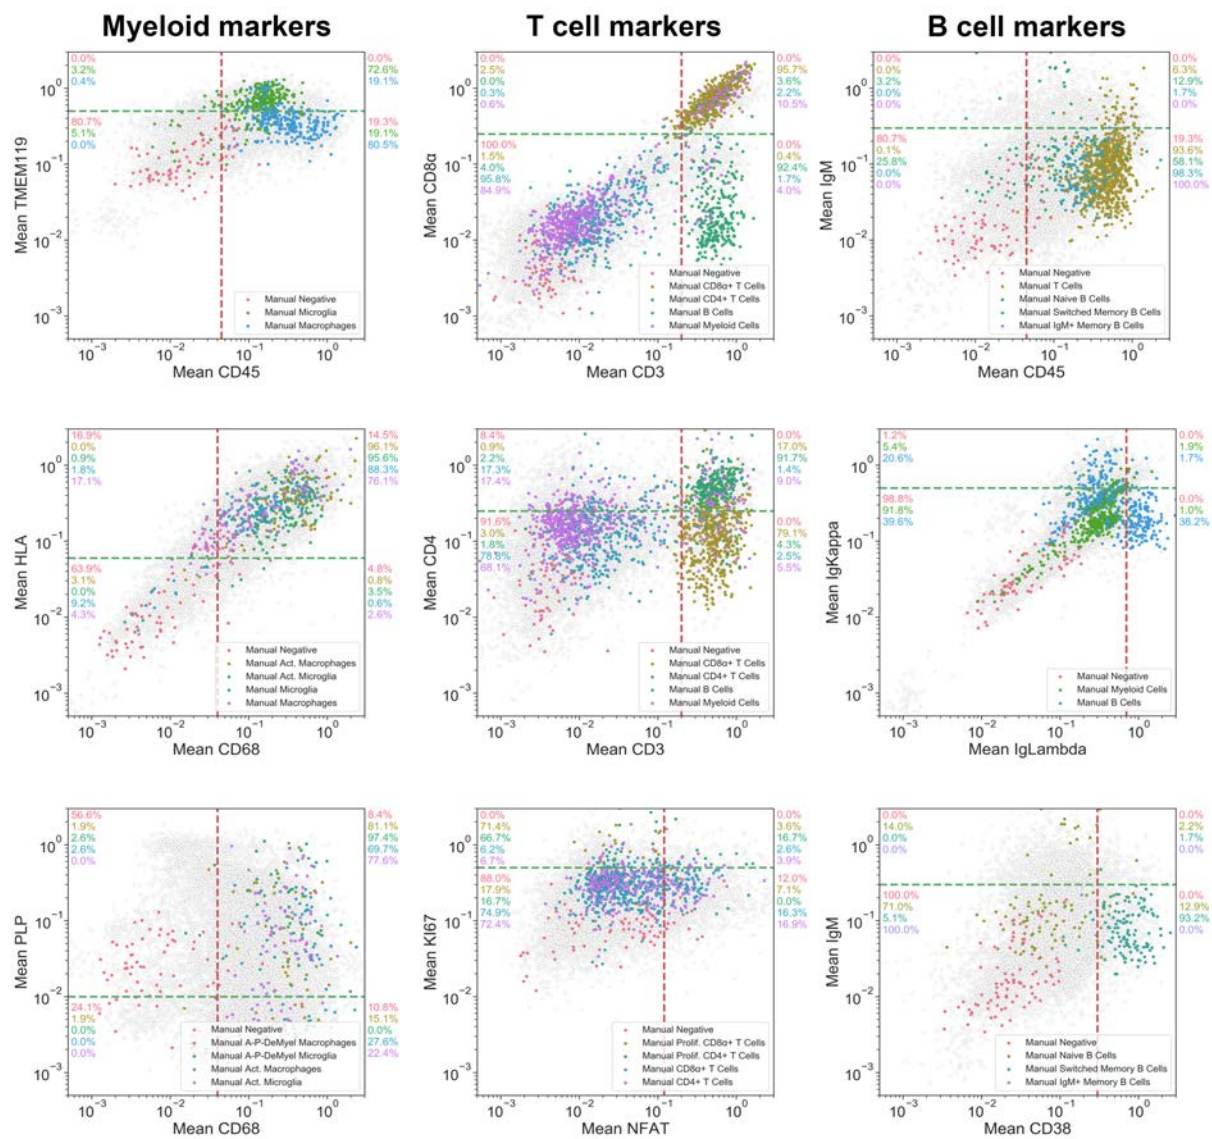

1055

1056 **Figure 7 – Figure Supplement 3**

**Macrophages or microglia**

**T cells**

**B cells**

**a - Gated based on the threshold from Supplementary Figure 4**

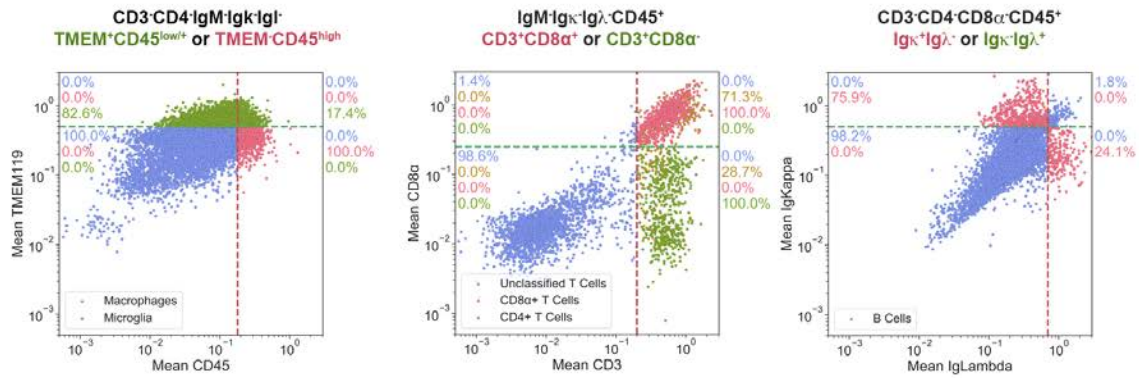

**b - Gated first based on the threshold from Supplementary Figure 4 then further based on (a)**

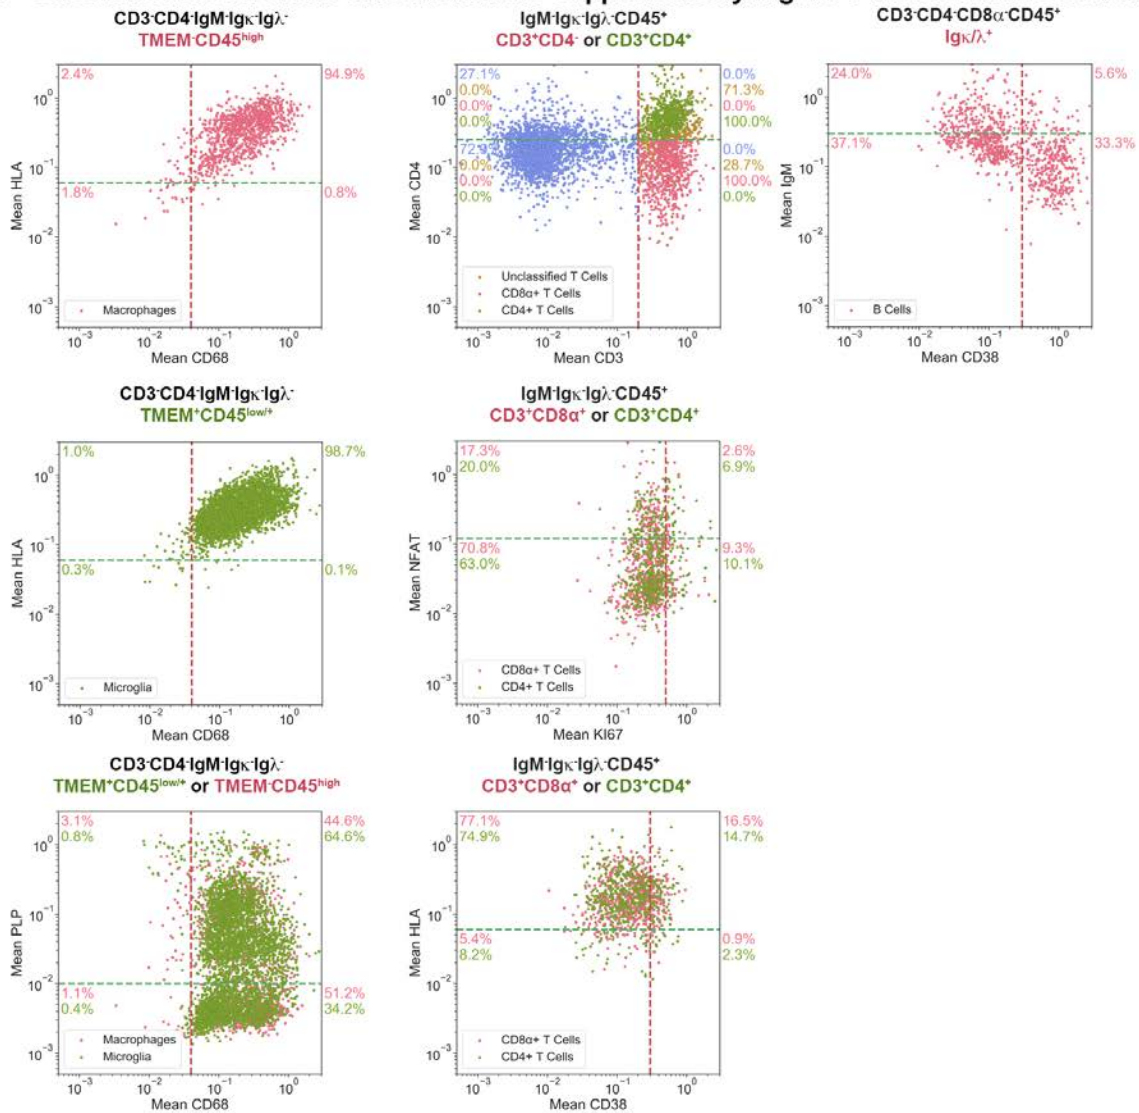

1057 **Figure 1 – Figure Supplement 1. Staging of MS lesions by IF.** General pathology:  
1058 demyelinating lesions (arrows and arrows head in **a** and **b**) seen in hematoxylin & eosin  
1059 (HE)/Luxol fast blue (LFB) stain of myelin (**a**) and oil red o (ORO) stain of neutral lipids  
1060 within macrophages (**b**). Lesional pathology: demyelinating lesions (arrow heads in **c** and **d**)  
1061 visualized by proteolipid protein (PLP in red) stain of myelin (**c**) and human leukocyte  
1062 antigen (HLA, in green) stain of microglia/macrophages (**d**). (**e-j**) Low magnification images  
1063 of HLA and PLP stains, depicting the distribution and morphology of HLA+  
1064 microglia/macrophages and myelin in different sites and lesion stages. (**e-f**) (P)reactive lesion  
1065 (block no. CR4A): Note the increase in microglia/macrophage reactivity at the (p)reactive  
1066 lesion site compared to the normal-appearing white matter (NAWM) (**e**), with normal PLP  
1067 myelin stain seen across the NAWM and (p)reactive lesion (**f**). (**g-h**) Active demyelinating  
1068 lesion (block no. CR4A): low glia reactivity and normal myelin stain is seen in the periplaque  
1069 white matter (PPWM). Profound microglia/macrophage activation is seen in the active lesion  
1070 (**g**), where myelin is being destroyed (**h**). (**i-j**) Mixed active/inactive demyelinating lesion  
1071 (block no. CL3A): low glia reactivity and normal myelin stain is seen in the periplaque white  
1072 matter (PPWM). An increased density of HLA<sup>+</sup> cells with the morphology of  
1073 microglia/macrophages is seen at the active SEL edge, with degraded PLP<sup>+</sup> myelin within  
1074 macrophages (arrows head in inset). In contrast, there are only few HLA<sup>+</sup> cells at the inactive  
1075 lesion center.

1076

1077 **Figure 1 – Figure Supplement 2. Workflow of Imaging Mass Cytometry.** A panel is  
1078 designed using pathologist-verified antibodies conjugated to metals. The brain tissue is stained  
1079 simultaneously with a cocktail of all the metal-conjugated antibodies and placed into the  
1080 Hyperion Imaging System. The tissue is ablated by a UV laser beam ( $\lambda = 219$  nm). A plume of  
1081 particles produced by the laser is taken up by a flow of inert helium or argon gas and introduced

1082 into the CyTOF mass cytometer (Hyperion Imaging System from Fluidigm (formerly DVS  
1083 Sciences)). Isotopes associated with each spot are detected and indexed against the source  
1084 location, yielding an intensity map of the target proteins throughout the tissue, creating  
1085 spatially resolved images of multiple parameters. The acquired data is analyzed and visualized  
1086 using heat maps.

1087

1088 **Figure 1 – Figure Supplement 3. Validation of IMC staining patterns in MS lesions.**

1089 Core of an active demyelinating lesion showing reduced proteolipid protein (PLP) stain by  
1090 immunohistochemistry (a), immunofluorescence (b) and IMC (c) and corresponding areas  
1091 stained with anti-HLA to detect antigen presenting cells by immunohistochemistry (d),  
1092 immunofluorescence (e) and IMC (f).

1093

1094 **Figure 7 – Figure Supplement 1. Single cell segmentation.** A Gaussian blur was applied to  
1095 the DNA signal (nucleus detection - a), and the resulting blurred image was segmented to identify  
1096 nuclear content corresponding to individual cell areas using a combination of threshold and  
1097 watershed filters (cell simulation - b). Subsequently, we interrogated the segmented image for the  
1098 presence of specific markers or combinations of markers that are either biologically co-expressed,  
1099 or whose expression is mutually exclusive. In this example we show CD3 (example of validation -  
1100 c).

1101

1102 **Figure 7 – Figure Supplement 2. Gating strategy used for the identification of cell subsets.**

1103 Gating strategy for the identification of cell subset phenotypes and activation states of  
1104 microglia, macrophages, T cells and B cells. In brief, the per-cell mean intensities of specific  
1105 marker combinations are shown here in 2D log-log biaxial scatterplots. Gates were established

1106 based on pathologist-verified positive cells (see coloured cells superimposed into each dotplot  
1107 contrasting with non-verified cells in grey).

1108

1109 **Figure 7 – Figure Supplement 3. Gating strategy used for the generation of heat maps.** Using  
1110 the quadrants that capture the appropriate positivity range of each cell phenotype shown in **Figure**  
1111 **7 – Figure Supplement 2**, cells were subjected to the positive and negative gating strategies as  
1112 outlined in the Materials and Methods for each lineage and indicated in **(a)**. Subsequently, these  
1113 cells were plotted for the marker combinations listed in **Table 3**. The frequency of cells in each  
1114 quadrant are indicated. Note that some CD3<sup>+</sup>CD45<sup>+</sup> T cells could not be classified because they fell  
1115 outside of the specified gates for either of the two markers – CD8<sup>+</sup> cells that were not simultaneously  
1116 CD4<sup>-</sup>, or CD4<sup>+</sup> cells that were not simultaneously CD8<sup>-</sup>. This is due to the dynamic range of these  
1117 particular markers and thus our inability to get a clean CD4<sup>+</sup>CD8<sup>-</sup> or CD4<sup>-</sup>CD8<sup>+</sup> T cell  
1118 population. Cells that fulfilled the gating criteria specified above each image, but which did not  
1119 fulfill the requirements for classification as Macrophages, Microglia, B cells or T cells, are shown  
1120 in blue.

1121 **Source data**

1122 **Figure 7 – Source Data 1**

1123 Source file for quantitative data of all ROI:

1124 ROI 2 from block 95-056 (white matter control)

1125 ROI 1 from block CL3a (active lesion)

1126 ROI 2.1 from block CL3a (mixed active-inactive lesion)

1127 ROI 2.2 from block CL3a (mixed active-inactive lesion)

1128 ROI 3 from block CL3a (mixed active-inactive lesion)

1129 ROI 4 from block CL3a (active lesion)

1130 ROI 2 from block CR4a (mixed active-inactive lesion)

1131 ROI 4 from block CR4a (active lesion)

1132 ROI 8 from block CR4a (normal-appearing white matter)

1133 ROI 3 from block CR4a (active lesion)

1134 ROI 1 from block CR4a ((p)reactive lesion)

1135 ROI 5 from block CR4a (active lesion)

1136 ROI 6 from block CR4a (mixed active-inactive lesion)
